# Supplementary material for: Potential Application of Pyroptosis in Kidney Renal Clear Cell Carcinoma Immunotherapy and Targeted Therapy
Source: Front Pharmacol. 2022 Jun 15;13:918647. doi: 10.3389/fphar.2022.918647 (PMC9252305; doi:10.3389/fphar.2022.918647)
Supplement: Supplementary file 9 [file Table6.XLSX]

## Sheet: TIDE_output
Patient	No benefits	Responder	TIDE	IFNG	MSI Expr Sig	Merck18	CD274	CD8	CTL.flag	Dysfunction	Exclusion	MDSC	CAF	TAM M2
TCGA-B0-5095-01A-01R-1420-07	TRUE	FALSE	2.3	-84.88	0	-12.01	-1.29	1.61	FALSE	0.17	2.3	0.06	0.29	0
TCGA-BP-4770-01A-01R-1503-07	TRUE	FALSE	1.89	-38.2	0	-21.95	-0.13	0.72	FALSE	0.02	1.89	0.03	0.25	0.01
TCGA-B0-5080-01A-01R-1503-07	TRUE	FALSE	1.68	-79.37	0	4.59	-0.83	4.74	FALSE	0.28	1.68	0.05	0.21	0
TCGA-B0-4696-01A-01R-1277-07	TRUE	FALSE	1.67	-155.21	0	-56.03	-1.11	-3.4	FALSE	-0.06	1.67	0.04	0.21	0.01
TCGA-B0-4703-01A-01R-1277-07	TRUE	FALSE	1.62	-17.45	0	5	-0.12	4.67	FALSE	0.18	1.62	0.05	0.22	-0.02
TCGA-AK-3431-01A-02R-1277-07	TRUE	FALSE	1.51	-50.34	1	-9.17	-0.88	-1.33	FALSE	-0.09	1.51	0.05	0.16	0.02
TCGA-CJ-4907-01A-01R-1426-07	TRUE	FALSE	1.49	-11.97	0	-0.07	-0.54	-2.22	FALSE	0.21	1.49	0.03	0.18	0.01
TCGA-BP-5177-01A-01R-1426-07	TRUE	FALSE	1.47	-92.21	0	-6.13	-0.6	-0.56	FALSE	0.09	1.47	0.06	0.15	0.01
TCGA-B8-5550-01A-01R-1541-07	FALSE	FALSE	1.45	50.67	0	15.58	0.31	0.04	FALSE	0.11	1.45	0	0.22	0.01
TCGA-BP-4795-01A-02R-1420-07	TRUE	FALSE	1.42	-69.87	0	-8.83	-0.89	-1.18	FALSE	0.23	1.42	0.03	0.17	0.02
TCGA-BP-4337-01A-01R-1289-07	TRUE	FALSE	1.41	-107.37	1	-31.7	0.37	-1.94	FALSE	0.18	1.41	0.03	0.17	0.02
TCGA-B0-4688-01A-01R-1277-07	TRUE	FALSE	1.38	-97.25	0	-42.52	7.19	-3.05	FALSE	-0.17	1.38	0.06	0.15	0
TCGA-B0-5100-01A-01R-1420-07	TRUE	FALSE	1.34	-147.19	1	-34.04	-0.98	-2.85	FALSE	0.07	1.34	0.05	0.14	0.02
TCGA-B8-A8YJ-01A-13R-A39I-07	TRUE	FALSE	1.3	-23.21	0	10.92	-0.61	-1.47	FALSE	0.39	1.3	0	0.22	-0.01
TCGA-BP-4762-01A-02R-1289-07	FALSE	FALSE	1.2	47.95	1	-4.86	-0.57	0.85	FALSE	-0.03	1.2	0.01	0.14	0.03
TCGA-CZ-5988-01A-11R-1672-07	TRUE	FALSE	1.19	-51.36	0.42	-7.82	-0.17	0.78	FALSE	-0.03	1.19	0.06	0.14	-0.02
TCGA-B0-4843-01A-01R-1277-07	TRUE	FALSE	1.19	-121.86	0	-24.84	-0.93	-2.85	FALSE	0.11	1.19	0.04	0.13	0.01
TCGA-CJ-4871-01A-01R-1305-07	FALSE	FALSE	1.17	51.91	1	-0.1	-0.26	-0.44	FALSE	0.02	1.17	0.05	0.13	0
TCGA-BP-4345-01A-01R-1289-07	FALSE	FALSE	1.16	16.91	0	13.1	1.81	-0.89	FALSE	0.21	1.16	0.01	0.17	0
TCGA-CJ-4905-01A-02R-1426-07	TRUE	FALSE	1.11	-80.28	0	-4.3	-0.14	-1.25	FALSE	0.17	1.11	0.03	0.12	0.02
TCGA-B8-5545-01A-01R-1672-07	FALSE	FALSE	1.09	52.64	0	21.81	-0.22	-1.46	FALSE	0.31	1.09	-0.01	0.17	0
TCGA-BP-5195-01A-02R-1426-07	FALSE	FALSE	1.08	25.48	0	6.06	-0.71	-1.31	FALSE	0.19	1.08	0.01	0.15	0
TCGA-BP-4784-01A-01R-1305-07	TRUE	FALSE	1.05	-113.92	1	-21.94	-1.05	-2.96	FALSE	-0.1	1.05	0.06	0.08	0.02
TCGA-CJ-4918-01A-01R-1426-07	FALSE	FALSE	1.04	2.77	0	-13.42	-0.7	1.12	FALSE	0.26	1.04	0	0.14	0.02
TCGA-A3-3308-01A-02R-1325-07	TRUE	FALSE	1.01	-43.79	0	-14.32	1.04	-2.25	FALSE	-0.19	1.01	0.02	0.13	0
TCGA-DV-5565-01A-01R-1541-07	FALSE	FALSE	1	-53.11	0	4.87	-0.13	-1.38	FALSE	0.19	1	0.07	0.09	-0.01
TCGA-AS-3778-01A-01R-A32Z-07	FALSE	FALSE	0.97	-17.78	1	-4.01	-0.36	-1.56	FALSE	0.07	0.97	0.03	0.11	0
TCGA-BP-4332-01A-01R-1289-07	FALSE	FALSE	0.97	-91.22	1	-19.4	-0.97	-1.71	FALSE	-0.18	0.97	0.04	0.07	0.03
TCGA-BP-4760-01A-02R-1420-07	FALSE	FALSE	0.96	-114.12	1	-37.03	0.46	-3.32	FALSE	-0.1	0.96	0.04	0.09	0.02
TCGA-BP-4166-01A-02R-1289-07	FALSE	FALSE	0.95	26.32	0.83	-11	-0.29	-0.28	FALSE	-0.04	0.95	0.03	0.09	0.03
TCGA-CJ-6033-01A-11R-1672-07	FALSE	FALSE	0.94	-61.07	0.01	-1.34	-0.64	-0.53	FALSE	-0.05	0.94	0.04	0.13	-0.02
TCGA-BP-5010-01A-02R-1420-07	FALSE	FALSE	0.93	-114.73	0.02	-30.05	-0.76	0.53	FALSE	0.17	0.93	0.02	0.12	0
TCGA-BP-4177-01A-02R-1420-07	FALSE	FALSE	0.92	-119.15	1	-32.58	-0.67	-2.93	FALSE	-0.1	0.92	0.05	0.06	0.02
TCGA-CJ-5679-01A-11R-1541-07	FALSE	FALSE	0.92	-141.7	0.14	-29.14	-0.77	-1.85	FALSE	-0.07	0.92	0.03	0.13	-0.02
TCGA-CJ-4920-01A-01R-1426-07	FALSE	FALSE	0.91	-39.79	0.9	-16.5	-0.73	-2.72	FALSE	-0.03	0.91	0.05	0.12	-0.03
TCGA-B0-5120-01A-01R-1420-07	FALSE	FALSE	0.9	-6.82	1	-10.52	-0.35	-2.66	FALSE	0.07	0.9	0.03	0.12	-0.01
TCGA-EU-5905-01A-11R-1672-07	FALSE	FALSE	0.9	-11.26	1	4.73	-0.86	1	FALSE	0.08	0.9	0.04	0.09	0.01
TCGA-BP-4159-01A-02R-1289-07	FALSE	FALSE	0.89	-38.86	1	-11.07	-0.48	-1.91	FALSE	-0.11	0.89	0.04	0.07	0.03
TCGA-BP-4789-01A-01R-1305-07	FALSE	FALSE	0.89	-113.15	0.17	-23.62	-0.4	-2.27	FALSE	0.02	0.89	0.03	0.09	0.02
TCGA-BP-4769-01A-01R-1289-07	FALSE	FALSE	0.89	-128.16	1	-32.75	-0.84	-3.79	FALSE	0.07	0.89	0.03	0.11	0
TCGA-B0-5108-01A-01R-1420-07	FALSE	FALSE	0.87	122.35	0	15.19	2.12	-0.01	FALSE	0.32	0.87	-0.01	0.17	-0.03
TCGA-A3-3349-01A-01R-1188-07	FALSE	FALSE	0.86	-79.19	0	-13.13	-1.37	-0.72	FALSE	0.19	0.86	0	0.12	0.02
TCGA-CW-5588-01A-01R-1541-07	FALSE	FALSE	0.86	82.26	1	-19.72	-0.71	-1.09	FALSE	0.04	0.86	0.01	0.1	0.02
TCGA-A3-3316-01A-01R-0864-07	FALSE	FALSE	0.85	22.82	0	-15.65	-1.07	-2.36	FALSE	-0.04	0.85	0.01	0.12	0.01
TCGA-BP-4986-01A-01R-1334-07	FALSE	FALSE	0.85	43.22	0	-10.11	-0.64	-2.36	FALSE	0.1	0.85	0.02	0.12	-0.01
TCGA-CW-5590-01A-01R-1541-07	FALSE	FALSE	0.84	5.87	1	0.05	0.15	0.29	FALSE	0	0.84	0.06	0.06	0.01
TCGA-BP-4355-01A-01R-1289-07	FALSE	FALSE	0.83	-120.92	0	-15.98	-0.37	-3.22	FALSE	0.19	0.83	0.03	0.09	0.01
TCGA-BP-5170-01A-01R-1426-07	FALSE	FALSE	0.81	-18.14	1	1.98	-0.24	-1.46	FALSE	-0.03	0.81	0.03	0.08	0.01
TCGA-CJ-4889-01A-01R-1305-07	FALSE	FALSE	0.8	101.77	0	25.29	-0.13	4.08	FALSE	0.45	0.8	-0.01	0.15	0
TCGA-BP-4803-01A-01R-1305-07	FALSE	FALSE	0.8	-24.61	1	-22.43	-0.96	-1.22	FALSE	-0.09	0.8	0.03	0.1	0
TCGA-B0-5812-01A-11R-1672-07	FALSE	FALSE	0.8	-12.75	0.01	5.97	-0.24	-0.68	FALSE	-0.05	0.8	0.02	0.1	0.01
TCGA-B0-4844-01A-01R-1277-07	FALSE	FALSE	0.77	-58.5	1	-19.08	-0.39	1.4	FALSE	0.07	0.77	0.06	0.11	-0.05
TCGA-CJ-4908-01A-01R-1426-07	FALSE	FALSE	0.77	-27.69	0	-3.78	-0.28	0.64	FALSE	0.32	0.77	0.01	0.12	-0.01
TCGA-B0-4837-01A-01R-1305-07	FALSE	FALSE	0.76	-25.17	0.03	-7.42	-0.82	-1.98	FALSE	-0.03	0.76	0.01	0.12	-0.01
TCGA-A3-A8OX-01A-11R-A37O-07	FALSE	FALSE	0.76	31.99	0	24.83	0.81	0.07	FALSE	0.14	0.76	-0.02	0.14	0
TCGA-B4-5843-01A-11R-1672-07	FALSE	FALSE	0.76	-75.36	0.16	-28.78	0	-3.13	FALSE	-0.49	0.76	0.02	0.1	0
TCGA-B0-5116-01A-02R-1420-07	FALSE	FALSE	0.75	-127.74	1	-31.18	-0.78	-1.74	FALSE	-0.19	0.75	0.06	0.05	0
TCGA-CZ-4854-01A-01R-1305-07	FALSE	FALSE	0.73	-78.63	0.9	-24.4	-0.71	-0.9	FALSE	-0.13	0.73	0.04	0.06	0.01
TCGA-BP-4960-01A-01R-1334-07	FALSE	FALSE	0.73	-12.93	0.98	-11.76	-0.7	0	FALSE	0.19	0.73	0.04	0.08	-0.01
TCGA-CJ-5677-01A-11R-1541-07	FALSE	FALSE	0.72	84.03	0	10.35	-0.62	-1.85	FALSE	0.03	0.72	0	0.12	-0.01
TCGA-DV-5567-01A-01R-1541-07	FALSE	FALSE	0.72	-138.4	1	-40.22	-0.82	-3.31	FALSE	-0.1	0.72	0.04	0.05	0.01
TCGA-B0-5694-01A-11R-1541-07	FALSE	FALSE	0.71	-42.28	1	-8.21	-0.92	-2.82	FALSE	0.02	0.71	0.03	0.08	0
TCGA-BP-4771-01A-01R-1289-07	FALSE	FALSE	0.7	209.64	0	128.66	-0.03	52.27	TRUE	0.7	-0.67	-0.04	-0.04	-0.02
TCGA-BP-4781-01A-01R-1305-07	FALSE	FALSE	0.7	-8.46	0.97	-7	-0.7	-2.53	FALSE	-0.17	0.7	0.02	0.08	0
TCGA-MM-A564-01A-11R-A266-07	FALSE	FALSE	0.7	-118.01	1	-14.04	-0.77	-2.6	FALSE	-0.16	0.7	0.06	0.02	0.03
TCGA-BP-4352-01A-01R-1289-07	FALSE	FALSE	0.7	-165.32	0	-54.24	1.53	-2.89	FALSE	-0.11	0.7	0.06	0.06	-0.01
TCGA-BP-4169-01A-02R-1289-07	FALSE	FALSE	0.69	68.53	0.74	16.53	0.38	0.84	FALSE	0.2	0.69	0	0.14	-0.04
TCGA-BP-4971-01A-01R-1334-07	FALSE	FALSE	0.69	8.12	0	-4.44	1.25	-1.23	FALSE	0.48	0.69	-0.03	0.15	-0.01
TCGA-BP-5198-01A-01R-1426-07	FALSE	FALSE	0.69	44.48	0	-9.55	-0.68	0.63	FALSE	0.07	0.69	0.01	0.11	-0.02
TCGA-A3-3347-01A-02R-1325-07	FALSE	FALSE	0.69	124.47	0	0.33	-0.48	0.43	FALSE	0.23	0.69	-0.03	0.17	-0.03
TCGA-B0-5695-01A-11R-1541-07	FALSE	FALSE	0.69	-74.79	1	-2.71	0.12	-0.76	FALSE	-0.1	0.69	0.05	0.06	-0.01
TCGA-BP-4787-01A-01R-1305-07	FALSE	FALSE	0.68	35.18	0.2	4.24	-0.25	0.07	FALSE	0.13	0.68	0	0.13	-0.02
TCGA-B8-A54K-01A-11R-A33J-07	FALSE	FALSE	0.68	-152.77	1	-40.51	-0.79	-3.54	FALSE	-0.15	0.68	0.05	0.03	0.02
TCGA-BP-4765-01A-01R-1289-07	FALSE	FALSE	0.65	-74.95	1	-25.35	-0.69	-3.65	FALSE	-0.27	0.65	0.03	0.07	0
TCGA-CJ-4870-01A-01R-1305-07	FALSE	FALSE	0.65	-85.64	1	-3.8	0.8	-2.88	FALSE	-0.11	0.65	0.05	0.03	0.02
TCGA-B0-4718-01A-01R-1277-07	FALSE	FALSE	0.65	-22.66	1	12.11	2.24	2.52	FALSE	0.06	0.65	0.07	0.03	0
TCGA-BP-4974-01A-01R-1334-07	FALSE	FALSE	0.65	-115.25	0	-20.88	-0.82	-2.1	FALSE	0.14	0.65	0.03	0.06	0.01
TCGA-BP-4961-01A-01R-1334-07	FALSE	FALSE	0.64	-105.02	0	-14.66	-0.61	-2.51	FALSE	0.09	0.64	0.02	0.06	0.02
TCGA-B0-5690-01A-11R-1541-07	FALSE	FALSE	0.64	-77.41	0	6.28	-0.97	-2.47	FALSE	0.32	0.64	0.03	0.07	0.01
TCGA-3Z-A93Z-01A-11R-A37O-07	FALSE	FALSE	0.64	-9.4	0.57	32.81	0.65	-1.4	FALSE	0.11	0.64	0.04	0.06	0
TCGA-A3-A6NL-01A-11R-A33J-07	FALSE	FALSE	0.63	36.17	0	31.66	-1.03	-1.43	FALSE	0.4	0.63	0.04	0.06	0
TCGA-CZ-5467-01A-01R-1503-07	FALSE	FALSE	0.62	-31.32	1	-9.53	-0.39	-2.09	FALSE	-0.08	0.62	0.04	0.08	-0.03
TCGA-AK-3436-01A-02R-1325-07	FALSE	FALSE	0.62	-64.87	1	-29.39	-0.37	0.19	FALSE	-0.1	0.62	0.03	0.04	0.01
TCGA-G6-A8L7-01A-11R-A37O-07	FALSE	FALSE	0.62	-162.13	1	-45.35	-0.13	0.3	FALSE	-0.03	0.62	0.04	0.06	-0.01
TCGA-MM-A84U-01A-11R-A37O-07	FALSE	FALSE	0.61	-44.09	0	2.31	-0.74	-1.5	FALSE	0.28	0.61	0	0.1	0
TCGA-BP-5181-01A-01R-1426-07	FALSE	FALSE	0.61	-19.48	0.98	15.52	0.05	-1.35	FALSE	-0.01	0.61	0.03	0.07	-0.01
TCGA-A3-3365-01A-01R-0864-07	FALSE	FALSE	0.6	16.04	0.04	-5.37	-0.41	-1.24	FALSE	-0.02	0.6	0.02	0.07	0.01
TCGA-BP-4327-01A-01R-1289-07	FALSE	FALSE	0.6	-114.63	1	-27.07	0.6	-1.28	FALSE	0.12	0.6	0.05	0.05	-0.01
TCGA-CJ-5676-01A-11R-1541-07	FALSE	FALSE	0.59	22.23	0	5.12	-0.41	3.25	FALSE	0.2	0.59	0.03	0.07	-0.01
TCGA-CZ-5468-01A-01R-1503-07	FALSE	FALSE	0.58	-44.6	0	-14.32	1.5	-0.45	FALSE	-0.01	0.58	0.02	0.1	-0.03
TCGA-AK-3454-01A-02R-1277-07	FALSE	FALSE	0.58	-109.86	0	-15.48	-1.05	1.77	FALSE	0.23	0.58	0.02	0.06	0
TCGA-B0-5696-01A-11R-1541-07	FALSE	FALSE	0.58	-8.8	1	-4.29	2.99	-0.49	FALSE	-0.1	0.58	0.04	0.06	-0.01
TCGA-B0-5097-01A-01R-1420-07	FALSE	FALSE	0.58	10.42	0	-14.19	-0.01	-0.42	FALSE	-0.08	0.58	0	0.12	-0.03
TCGA-BP-5009-01A-01R-1334-07	FALSE	FALSE	0.58	61.7	0	-10.93	-0.61	5.91	FALSE	0.13	0.58	0.02	0.07	0
TCGA-BP-5187-01A-01R-1426-07	FALSE	FALSE	0.57	-61.79	1	-14.68	-0.25	2.18	FALSE	-0.08	0.57	0.01	0.11	-0.04
TCGA-B0-5098-01A-01R-1420-07	FALSE	FALSE	0.57	-158.78	0	-44.91	-1.17	-2.74	FALSE	-0.27	0.57	0.06	0.01	0.01
TCGA-B0-4712-01A-01R-1503-07	FALSE	FALSE	0.57	41.88	0.37	-8.26	0.25	1.67	FALSE	-0.08	0.57	0.03	0.07	-0.02
TCGA-BP-4326-01A-01R-1289-07	FALSE	FALSE	0.57	-98.36	1	-32.77	0.03	-2.28	FALSE	-0.01	0.57	0.02	0.08	-0.02
TCGA-B0-4813-01A-01R-1277-07	FALSE	FALSE	0.56	-102.62	1	-28.78	-0.7	-2.74	FALSE	-0.09	0.56	0.06	0.02	0
TCGA-BP-4351-01A-01R-1289-07	FALSE	FALSE	0.55	-84.82	1	-23.21	-1.14	-1.57	FALSE	0.04	0.55	0.03	0.06	-0.01
TCGA-B0-5115-01A-01R-1420-07	FALSE	FALSE	0.55	-12.6	0.79	13.85	0.86	-2.24	FALSE	-0.01	0.55	0.03	0.07	-0.01
TCGA-B8-4620-01A-02R-1325-07	FALSE	FALSE	0.55	31.56	1	-13.82	-0.32	-2.69	FALSE	-0.01	0.55	0.03	0.11	-0.06
TCGA-B0-5710-01A-11R-1672-07	FALSE	FALSE	0.54	-22.08	0	17.1	0.21	-0.8	FALSE	0.19	0.54	0.03	0.07	-0.01
TCGA-A3-3387-01A-01R-1541-07	FALSE	FALSE	0.54	164.27	0.06	11.01	-0.81	-2.18	FALSE	0.04	0.54	0.02	0.08	-0.02
TCGA-CZ-5987-01A-11R-1672-07	FALSE	FALSE	0.53	79.76	1	15.61	-0.43	0.2	FALSE	0.06	0.53	0.04	0.07	-0.04
TCGA-B4-5378-01A-01R-1503-07	FALSE	FALSE	0.53	-107.7	1	-19.35	-0.59	-2.64	FALSE	-0.03	0.53	0.04	0.05	-0.01
TCGA-BP-4346-01A-01R-1289-07	FALSE	FALSE	0.52	359.07	0	140.84	1.15	44.44	TRUE	0.52	-0.98	-0.04	-0.07	-0.04
TCGA-B0-4707-01A-01R-1277-07	FALSE	FALSE	0.52	-149.26	0.07	-40.4	-0.78	4.36	FALSE	0.06	0.52	0.02	0.06	0
TCGA-BP-4173-01A-02R-1289-07	FALSE	FALSE	0.52	627.98	0	225.9	1.88	48.31	TRUE	0.52	-0.49	-0.03	-0.01	-0.03
TCGA-B4-5838-01A-11R-1672-07	FALSE	FALSE	0.51	-75.53	1	-40.09	2.47	-0.28	FALSE	-0.22	0.51	-0.01	0.08	0.01
TCGA-B0-5709-01A-11R-1541-07	FALSE	FALSE	0.51	241.51	0	93.33	0.36	10.03	TRUE	0.51	-0.09	-0.04	0.05	-0.02
TCGA-BP-4776-01A-01R-1289-07	FALSE	FALSE	0.51	-63.78	1	5.34	-0.14	-0.36	FALSE	0.18	0.51	0.04	0.04	0
TCGA-CZ-5984-01A-11R-1672-07	FALSE	FALSE	0.51	73.61	1	-5.91	-0.66	-1.2	FALSE	0.06	0.51	0.03	0.06	-0.01
TCGA-CJ-4895-01A-01R-1305-07	FALSE	FALSE	0.51	87.77	0	11.06	-0.97	1.46	FALSE	0.17	0.51	-0.03	0.14	-0.03
TCGA-DV-5576-01A-01R-1541-07	FALSE	FALSE	0.51	-128.96	1	-27.46	-0.98	-3.77	FALSE	-0.06	0.51	0.03	0.05	0
TCGA-B0-4841-01A-01R-1277-07	FALSE	FALSE	0.5	-128.5	0	-15.58	-0.14	-0.11	FALSE	0.19	0.5	0.03	0.03	0.01
TCGA-EU-5907-01A-11R-1672-07	FALSE	FALSE	0.5	-80.95	1	-18.26	1.88	-2.84	FALSE	-0.19	0.5	0.04	0.07	-0.04
TCGA-B8-A7U6-01A-12R-A37O-07	FALSE	FALSE	0.5	-35.26	1	-14.08	-0.67	-2.4	FALSE	-0.04	0.5	0.04	0.08	-0.04
TCGA-B0-5081-01A-01R-1334-07	FALSE	FALSE	0.5	234.69	0	64.61	0.53	10.13	TRUE	0.5	-0.09	-0.01	0.01	-0.01
TCGA-BP-4761-01A-01R-1289-07	FALSE	FALSE	0.5	-105.22	1	-11.21	0.57	4.02	FALSE	0.01	0.5	0.04	0.05	-0.02
TCGA-BP-4349-01A-01R-1289-07	FALSE	FALSE	0.5	-93.57	0.01	-14.2	-0.74	-2.19	FALSE	0.05	0.5	0.02	0.06	0
TCGA-BP-5194-01A-02R-1426-07	FALSE	FALSE	0.5	-40.1	0.91	-10.77	0.21	-1.24	FALSE	-0.12	0.5	0.01	0.06	0.01
TCGA-DV-A4W0-05A-11R-A266-07	FALSE	FALSE	0.49	-141.27	1	-32.83	-0.4	-3.75	FALSE	-0.12	0.49	0.06	0.01	0
TCGA-A3-3382-01A-02R-1325-07	FALSE	FALSE	0.49	-5.85	0.98	-26.08	-0.47	1.73	FALSE	-0.2	0.49	0.01	0.06	-0.01
TCGA-B0-4848-01A-01R-1277-07	FALSE	FALSE	0.49	90.64	0	10.94	-0.69	3.84	FALSE	-0.07	0.49	-0.01	0.11	-0.02
TCGA-G6-A8L8-01A-21R-A37O-07	FALSE	FALSE	0.49	-131.09	1	-12.23	0.07	-3.32	FALSE	-0.13	0.49	0.05	0.02	0
TCGA-B0-4814-01A-01R-1277-07	FALSE	FALSE	0.49	-53.09	1	-10.43	1.16	-1.6	FALSE	-0.13	0.49	0.02	0.03	0.02
TCGA-BP-4344-01A-01R-1289-07	FALSE	FALSE	0.48	-15.34	0.01	1.78	-0.54	-3.27	FALSE	0.12	0.48	0.01	0.08	-0.01
TCGA-B0-4822-01A-01R-1277-07	FALSE	FALSE	0.48	-96.44	0	-10.95	-0.75	2.66	FALSE	0.18	0.48	0.02	0.05	0
TCGA-AK-3445-01A-02R-1277-07	FALSE	FALSE	0.48	77.52	0	18.94	-0.78	1.35	FALSE	0.01	0.48	0.02	0.08	-0.03
TCGA-CJ-4642-01B-01R-1305-07	FALSE	FALSE	0.48	-114.84	0	-16.95	-1.36	-1.44	FALSE	0.08	0.48	0.04	0.04	0
TCGA-B0-4714-01A-01R-1277-07	FALSE	FALSE	0.48	153.58	0	67.44	1.46	16.79	TRUE	0.48	-0.63	-0.02	-0.06	-0.02
TCGA-CZ-5456-01A-01R-1503-07	FALSE	FALSE	0.48	66.2	0	-12.9	-0.53	0.76	FALSE	0.01	0.48	0.01	0.08	-0.02
TCGA-B0-4839-01A-01R-1305-07	FALSE	FALSE	0.48	43.82	0.83	20.77	-0.24	-0.98	FALSE	0.13	0.48	0.03	0.03	0.01
TCGA-B8-5158-01A-01R-1420-07	FALSE	FALSE	0.48	37.29	0.18	-5.41	-0.35	3.44	FALSE	0	0.48	0	0.09	-0.02
TCGA-G6-A8L6-01A-11R-A37O-07	FALSE	FALSE	0.48	-32.34	1	27.84	-0.19	-0.59	FALSE	0	0.48	0.04	0.02	0.01
TCGA-B2-5636-01A-02R-1541-07	FALSE	FALSE	0.48	-85.03	0	-24.64	-1.04	-3.41	FALSE	0.15	0.48	0.02	0.04	0.01
TCGA-CW-5584-01A-01R-1541-07	FALSE	FALSE	0.47	22.93	0	-9.26	-0.7	-2.46	FALSE	0.07	0.47	0	0.07	0.01
TCGA-A3-A8OU-01A-11R-A37O-07	FALSE	FALSE	0.47	24.74	1	6.61	0.16	-1.27	FALSE	0.06	0.47	0.02	0.08	-0.02
TCGA-A3-A8CQ-01A-11R-A37O-07	FALSE	FALSE	0.46	-39.35	0	8.89	-0.87	-3.08	FALSE	0.09	0.46	0.01	0.05	0.01
TCGA-BP-5168-01A-01R-1420-07	FALSE	FALSE	0.46	-16.41	0.98	7.21	-0.39	0.06	FALSE	0.03	0.46	0.01	0.05	0.01
TCGA-CJ-4881-01A-01R-1305-07	FALSE	FALSE	0.46	30.51	0	-9.93	-0.95	1.48	FALSE	0	0.46	0.01	0.1	-0.01
TCGA-CW-6090-01A-11R-1672-07	FALSE	FALSE	0.46	94.62	0.88	4.29	0.45	2.48	FALSE	-0.09	0.46	0.02	0.05	0
TCGA-BP-4763-01A-01R-1289-07	FALSE	FALSE	0.46	-50.75	1	-8.27	-0.07	-1.36	FALSE	-0.25	0.46	-0.01	0.08	0
TCGA-CZ-5461-01A-01R-1503-07	FALSE	FALSE	0.45	95.52	1	11.06	-0.43	-1.45	FALSE	-0.25	0.45	0.02	0.04	0
TCGA-BP-4329-01A-02R-1289-07	FALSE	FALSE	0.45	80.04	1	5.6	0.01	-1.18	FALSE	-0.18	0.45	0.02	0.03	0.02
TCGA-B0-5102-01A-01R-1420-07	FALSE	FALSE	0.44	-40.24	1	-4.56	1.39	0.63	FALSE	-0.11	0.44	0.02	0.04	0
TCGA-BP-4964-01A-01R-1334-07	FALSE	FALSE	0.44	-0.15	1	0.29	0.37	0.94	FALSE	-0.22	0.44	0.03	0.04	0
TCGA-BP-5175-01A-01R-1426-07	FALSE	FALSE	0.44	-68.58	0	-5.34	0.41	0.59	FALSE	0.09	0.44	0.02	0.06	-0.01
TCGA-CJ-4899-01A-01R-1334-07	FALSE	FALSE	0.43	-29.31	0	4.75	0.15	-1.23	FALSE	0.21	0.43	-0.03	0.1	0
TCGA-BP-4804-01A-02R-1305-07	FALSE	FALSE	0.43	204.13	0	89.41	-0.1	13.08	TRUE	0.43	0.14	-0.02	0.05	-0.01
TCGA-DV-A4VZ-01A-11R-A266-07	FALSE	FALSE	0.43	-125.41	1	-31.85	1.32	-3.06	FALSE	-0.09	0.43	0.04	0.02	0
TCGA-CZ-5458-01A-01R-1503-07	FALSE	FALSE	0.43	33.05	1	-1.84	-0.25	1.09	FALSE	0.09	0.43	0.01	0.05	0
TCGA-CZ-5469-01A-01R-1503-07	FALSE	FALSE	0.42	-93.98	0.04	-22.37	-0.81	-1.53	FALSE	-0.09	0.42	0.03	0.03	0
TCGA-B4-5844-01A-11R-1672-07	FALSE	FALSE	0.42	-105.97	0	-14.86	-0.43	-2.76	FALSE	0.04	0.42	0.03	0.04	0
TCGA-A3-A6NN-01A-12R-A33J-07	FALSE	FALSE	0.42	38.77	0.01	27.67	-0.46	-1.06	FALSE	0.33	0.42	0.02	0.03	0.02
TCGA-DV-5569-01A-01R-1541-07	FALSE	FALSE	0.42	42.95	0.93	11.57	1.07	1.13	FALSE	0	0.42	0.02	0.07	-0.03
TCGA-DV-5575-01A-01R-1541-07	FALSE	FALSE	0.42	93.69	0.07	35.51	1.04	3.5	FALSE	0.11	0.42	0.04	0.08	-0.05
TCGA-A3-3325-01A-01R-0864-07	FALSE	FALSE	0.42	56.94	1	0.79	-0.75	-2.76	FALSE	-0.05	0.42	0.02	-0.01	0.05
TCGA-BP-4975-01A-01R-1334-07	FALSE	FALSE	0.41	-18.55	1	-21.46	-0.42	-2.66	FALSE	-0.24	0.41	0.01	0.03	0.02
TCGA-CJ-4897-01A-03R-1426-07	FALSE	FALSE	0.41	-27.68	1	-0.08	0.27	-0.45	FALSE	-0.03	0.41	0	0.04	0.03
TCGA-A3-A6NJ-01A-12R-A33J-07	FALSE	FALSE	0.41	206.88	0	90.73	2.43	17.15	TRUE	0.41	-0.59	-0.02	-0.04	-0.04
TCGA-CZ-4857-01A-01R-1305-07	FALSE	FALSE	0.41	-16.88	1	-14.57	-0.85	-0.93	FALSE	-0.13	0.41	0.01	0.06	-0.02
TCGA-CW-6087-01A-11R-1672-07	FALSE	FALSE	0.4	526.66	0	183.3	5.07	55.53	TRUE	0.4	-0.51	-0.04	-0.02	-0.04
TCGA-CJ-4882-01A-02R-1426-07	FALSE	FALSE	0.4	-6.94	0	17.93	-0.68	6.31	TRUE	0.4	0.85	0.03	0.13	-0.03
TCGA-CJ-4912-01A-01R-1426-07	FALSE	FALSE	0.4	-119.8	1	-33.61	-0.76	-1.67	FALSE	-0.04	0.4	0.03	0.04	0
TCGA-B0-5400-01A-01R-1503-07	FALSE	FALSE	0.4	8.56	0	31.87	1.17	1.92	FALSE	0.15	0.4	-0.01	0.1	-0.02
TCGA-CZ-5465-01A-01R-1503-07	FALSE	FALSE	0.4	-54.07	1	-14.97	3.14	-2.75	FALSE	-0.28	0.4	0.05	0.01	0
TCGA-CJ-5683-01A-11R-1541-07	FALSE	FALSE	0.4	-45.62	1	-3.34	-0.83	-1.12	FALSE	-0.03	0.4	0.02	0.05	-0.01
TCGA-MW-A4EC-01A-11R-A266-07	FALSE	FALSE	0.4	-36.53	1	-7.2	0.22	-2.02	FALSE	-0.2	0.4	0.04	0.01	0
TCGA-B0-4842-01A-02R-1420-07	FALSE	FALSE	0.4	-57.34	0	9.32	0.04	2.44	FALSE	0.18	0.4	-0.02	0.09	-0.01
TCGA-A3-3376-01A-02R-1420-07	FALSE	FALSE	0.4	-47.62	0	1.8	-0.95	-2.34	FALSE	0.37	0.4	-0.02	0.06	0.02
TCGA-B0-5691-01A-11R-1541-07	FALSE	FALSE	0.4	-4.57	0.05	-10.72	-0.32	-1.19	FALSE	0.14	0.4	-0.02	0.08	0
TCGA-B0-5084-01A-01R-1334-07	FALSE	FALSE	0.39	-107.23	0	-38.36	-1	-1.28	FALSE	-0.23	0.39	0.03	0	0.02
TCGA-CJ-4637-01A-02R-1325-07	FALSE	FALSE	0.39	413.27	0	133.56	2.21	50.47	TRUE	0.39	-0.82	-0.03	-0.05	-0.04
TCGA-BP-4342-01A-01R-1289-07	FALSE	FALSE	0.39	-57.25	1	-15.05	-1.05	-2.37	FALSE	0	0.39	0.01	0.06	-0.01
TCGA-B4-5834-01A-11R-1672-07	FALSE	FALSE	0.39	-55.69	0	17.66	0.06	-2.08	FALSE	0.11	0.39	0.02	0.06	-0.01
TCGA-CJ-4901-01A-01R-1426-07	FALSE	FALSE	0.39	242.72	0	69.82	1.64	15.23	TRUE	0.39	-0.33	0	0	-0.05
TCGA-B8-A54F-01A-11R-A266-07	FALSE	FALSE	0.38	26.22	1	-8.45	-0.11	-2.66	FALSE	-0.05	0.38	0.02	0.07	-0.03
TCGA-B4-5836-01A-11R-1672-07	FALSE	FALSE	0.38	-2.1	0	11.9	0.36	-0.62	FALSE	-0.07	0.38	-0.01	0.1	-0.02
TCGA-B0-5711-01A-11R-1672-07	FALSE	FALSE	0.38	0.28	0	10.68	0.57	0.16	FALSE	-0.03	0.38	0.03	0.04	0
TCGA-CJ-4887-01A-01R-1305-07	FALSE	FALSE	0.38	306.78	0	107.38	-0.13	17.95	TRUE	0.38	-0.37	-0.02	-0.02	-0.02
TCGA-CW-5580-01A-01R-1672-07	FALSE	FALSE	0.38	-31.44	1	-17.87	-0.29	-3.23	FALSE	-0.35	0.38	0	0.06	0
TCGA-BP-4330-01A-01R-1289-07	FALSE	FALSE	0.37	198.24	0.01	80.27	0.42	17.68	TRUE	0.37	-0.62	-0.03	-0.05	-0.01
TCGA-CJ-4916-01A-01R-1426-07	FALSE	FALSE	0.37	274.94	0	101.66	0.76	32.06	TRUE	0.37	-0.76	-0.03	-0.06	-0.02
TCGA-B0-5702-01A-11R-1541-07	FALSE	FALSE	0.37	0.65	1	-14.72	0.27	-1.44	FALSE	0.01	0.37	0.02	0.01	0.02
TCGA-BP-4758-01A-01R-1289-07	FALSE	FALSE	0.37	120.73	0	60.27	0.23	19.8	TRUE	0.37	-0.11	0.01	-0.02	-0.01
TCGA-AK-3428-01A-02R-1277-07	FALSE	FALSE	0.37	33.21	1	-4.86	1.26	-1.13	FALSE	-0.33	0.37	0.04	0.01	0
TCGA-B0-5693-01A-11R-1541-07	FALSE	FALSE	0.36	-86.25	1	-25.36	0.06	-3.24	FALSE	-0.12	0.36	0.03	0.02	0
TCGA-A3-3346-01A-01R-1766-07	FALSE	FALSE	0.36	58.26	0	-2.63	0.08	1.57	FALSE	0	0.36	0.01	0.07	-0.02
TCGA-BP-4967-01A-01R-1334-07	FALSE	FALSE	0.36	-50.95	1	-23.69	-0.9	-1.68	FALSE	-0.06	0.36	0.01	0.05	-0.01
TCGA-B0-4819-01A-01R-1277-07	FALSE	FALSE	0.36	11.53	0	54.24	1.9	28.78	TRUE	0.36	-0.26	-0.03	0.01	-0.02
TCGA-B8-5552-01B-11R-1672-07	FALSE	FALSE	0.36	20.04	0	9.32	0.63	1.82	FALSE	0.36	0.36	-0.04	0.1	-0.01
TCGA-T7-A92I-01A-11R-A37O-07	FALSE	FALSE	0.35	-82.61	0.87	-28.31	13.49	-1.84	FALSE	-0.02	0.35	-0.04	0.1	0
TCGA-B8-4153-01B-11R-1672-07	FALSE	FALSE	0.35	-83.34	0.91	-9.35	-0.39	-1.12	FALSE	0.01	0.35	0.04	0.02	0
TCGA-MM-A563-01A-11R-A266-07	FALSE	FALSE	0.35	174.78	0	35.24	0.41	3.3	TRUE	0.35	0.37	-0.01	0.07	0
TCGA-CJ-4888-01A-01R-1305-07	FALSE	FALSE	0.35	214.54	0	87.31	5.71	26.54	TRUE	0.35	-0.39	-0.05	0.04	-0.05
TCGA-B8-A54J-01A-11R-A33J-07	FALSE	FALSE	0.34	-25.08	0	24.46	0.77	4.12	TRUE	0.34	0.26	0.02	0.05	-0.03
TCGA-A3-3380-01A-01R-0864-07	FALSE	FALSE	0.34	-38.18	1	-4.55	-0.68	-1.93	FALSE	0.11	0.34	0	0.02	0.03
TCGA-B0-5094-01A-01R-1420-07	FALSE	FALSE	0.34	-93.23	1	-24.41	-0.96	-0.79	FALSE	-0.07	0.34	0	0.05	-0.01
TCGA-BP-4343-01A-02R-1289-07	FALSE	FALSE	0.34	443.62	0	18.74	0.71	2.05	FALSE	-0.05	0.34	-0.01	0.05	0.01
TCGA-BP-4807-01A-01R-1305-07	FALSE	FALSE	0.33	41.71	0	-11.24	-0.15	-2.87	FALSE	-0.06	0.33	-0.02	0.07	0
TCGA-B8-5165-01A-01R-1420-07	FALSE	FALSE	0.33	-55.77	0.98	-15.12	0.04	-1.81	FALSE	-0.02	0.33	-0.01	0.03	0.03
TCGA-B0-5692-01A-11R-1541-07	FALSE	FALSE	0.33	152.93	0	112.63	0.3	39.86	TRUE	0.33	-0.55	-0.02	-0.03	-0.03
TCGA-B8-4148-01A-02R-1325-07	FALSE	FALSE	0.33	290.14	0	55.19	1.31	22.92	TRUE	0.33	-0.83	-0.02	-0.07	-0.04
TCGA-A3-3362-01A-02R-1325-07	FALSE	FALSE	0.33	-62.44	1	-12.03	-0.5	-1.03	FALSE	-0.19	0.33	0	0.04	0.01
TCGA-BP-4985-01A-01R-1334-07	FALSE	FALSE	0.33	-97.22	0	-19.2	-0.15	-2.44	FALSE	-0.1	0.33	0.01	0.07	-0.03
TCGA-B0-5402-01A-01R-1503-07	FALSE	FALSE	0.33	25.65	1	6.99	0.77	-2.34	FALSE	-0.04	0.33	-0.01	0.04	0.02
TCGA-BP-4158-01A-02R-1289-07	FALSE	FALSE	0.33	-52.44	1	-1.09	-0.81	-1.87	FALSE	-0.12	0.33	0.02	0	0.02
TCGA-BP-5189-01A-02R-1426-07	FALSE	FALSE	0.33	170.83	0	31.45	-0.4	-1.51	FALSE	0.12	0.33	-0.03	0.1	-0.01
TCGA-CJ-4885-01A-01R-1305-07	FALSE	FALSE	0.33	-40.11	1	-12.26	0.25	-0.69	FALSE	-0.29	0.33	0.03	0.02	0
TCGA-B0-4823-01A-02R-1420-07	FALSE	FALSE	0.32	30.86	0	1.31	-0.16	7.48	FALSE	0.06	0.32	-0.01	0.06	-0.01
TCGA-B0-4845-01A-01R-1277-07	FALSE	FALSE	0.32	-113.16	1	-25.95	-0.77	-3.55	FALSE	-0.08	0.32	0.04	-0.02	0.03
TCGA-BP-5192-01A-01R-1426-07	FALSE	FALSE	0.32	-116.55	1	-19.54	-0.18	-2.22	FALSE	-0.04	0.32	0.01	0.03	0.01
TCGA-BP-5186-01A-01R-1426-07	FALSE	FALSE	0.32	-45.1	1	-2.4	0.14	0.49	FALSE	-0.03	0.32	0	0.06	-0.01
TCGA-B0-4697-01A-01R-1277-07	FALSE	FALSE	0.32	67.45	0	69.68	3.1	30.9	TRUE	0.32	-0.18	0	-0.01	-0.02
TCGA-CZ-5982-01A-11R-1672-07	FALSE	FALSE	0.32	-97.78	0.98	-24.43	0.08	-2.27	FALSE	-0.2	0.32	0.03	0.03	-0.01
TCGA-B0-5092-01A-01R-1420-07	FALSE	FALSE	0.32	126.8	0	113.28	0.42	42.79	TRUE	0.32	-0.35	0	-0.02	-0.03
TCGA-B8-5164-01A-01R-1420-07	FALSE	FALSE	0.31	515.81	0	135.68	3.11	37.26	TRUE	0.31	-0.83	-0.05	-0.04	-0.04
TCGA-B8-5551-01A-01R-1541-07	FALSE	FALSE	0.3	525.6	0	95.97	1.99	15.33	TRUE	0.3	-0.5	-0.04	-0.02	-0.02
TCGA-BP-4989-01A-01R-1334-07	FALSE	FALSE	0.3	140.22	0	66.4	0.96	34.9	TRUE	0.3	-0.26	-0.02	-0.01	-0.01
TCGA-BP-5176-01A-01R-1426-07	FALSE	FALSE	0.3	-33.89	0.99	0.02	-0.17	-1.45	FALSE	0.01	0.3	0	0.06	-0.01
TCGA-CJ-4634-01A-02R-1325-07	FALSE	FALSE	0.3	-53.36	0	-27.35	-0.8	-2.64	FALSE	-0.06	0.3	-0.01	0.05	0.01
TCGA-B0-4710-01A-01R-1503-07	FALSE	FALSE	0.3	-81.49	1	-25.22	-0.89	0.43	FALSE	0.04	0.3	0.02	0.03	-0.01
TCGA-BP-4993-01A-02R-1420-07	FALSE	FALSE	0.3	-39.64	0	23.63	-0.38	3.68	TRUE	0.3	0.64	0.03	0.11	-0.04
TCGA-CJ-4902-01A-01R-1426-07	FALSE	FALSE	0.29	21.54	0	16.39	-0.79	0.76	TRUE	0.29	0.93	0.01	0.14	0
TCGA-DV-5574-01A-01R-1541-07	FALSE	FALSE	0.29	160.13	0	28.49	0.15	6.83	TRUE	0.29	0.44	-0.01	0.1	-0.02
TCGA-CJ-4869-01A-02R-1426-07	FALSE	FALSE	0.29	244.76	0	124.82	0.43	37.85	TRUE	0.29	-0.28	-0.01	-0.01	-0.02
TCGA-6D-AA2E-01A-11R-A37O-07	FALSE	FALSE	0.29	-84.87	1	-32.38	11.08	-0.79	FALSE	0.07	0.29	-0.04	0.09	0
TCGA-B0-5077-01A-01R-1334-07	FALSE	FALSE	0.29	-1.86	0.94	-8.66	-0.71	0.43	FALSE	0.17	0.29	0	0.05	-0.01
TCGA-DV-5566-01A-01R-1541-07	FALSE	FALSE	0.29	-28.08	1	-2.97	-0.33	-1.67	FALSE	-0.16	0.29	0.03	0.05	-0.04
TCGA-BP-4998-01A-01R-1334-07	FALSE	FALSE	0.29	169.99	0	7.06	0.36	1.98	FALSE	0.31	0.29	0	0.06	-0.02
TCGA-B0-5106-01A-01R-1420-07	FALSE	FALSE	0.28	88.68	0	13.8	-0.76	4.94	TRUE	0.28	0.17	0	0.05	-0.03
TCGA-B0-5399-01A-01R-1503-07	FALSE	FALSE	0.28	19.88	1	17.65	-0.05	-0.32	FALSE	0	0.28	0.03	0.02	-0.01
TCGA-GK-A6C7-01A-11R-A33J-07	FALSE	FALSE	0.28	-55.82	0	4.96	-0.89	-1.3	FALSE	0.27	0.28	0.01	0.05	-0.01
TCGA-BP-4992-01A-01R-1334-07	FALSE	FALSE	0.28	-79.65	0.13	-14.4	0.08	7.59	TRUE	0.28	-0.47	0.01	-0.07	-0.01
TCGA-BP-5201-01A-01R-1426-07	FALSE	FALSE	0.28	127.73	0	57.16	0.13	14.84	TRUE	0.28	-0.03	0.02	0	-0.03
TCGA-B8-5163-01A-01R-1420-07	FALSE	FALSE	0.28	227.41	0	66.76	0.98	7.84	TRUE	0.28	0.42	0	0.1	-0.03
TCGA-DV-5573-01A-01R-1541-07	FALSE	FALSE	0.28	263.88	0	91.58	-0.13	42.11	TRUE	0.28	-0.47	-0.02	-0.03	-0.02
TCGA-A3-3317-01A-02R-1325-07	FALSE	FALSE	0.27	-23.03	0	-14.46	-0.45	1.18	FALSE	0.07	0.27	0	0.04	0
TCGA-CZ-5464-01A-01R-1503-07	FALSE	FALSE	0.27	182.59	0	40.74	-0.23	4.83	TRUE	0.27	0.08	-0.01	0.03	-0.01
TCGA-B2-5633-01A-01R-1541-07	FALSE	FALSE	0.27	68.32	0	9.98	-0.79	-0.07	FALSE	0.21	0.27	-0.03	0.08	0
TCGA-BP-4162-01A-02R-1325-07	FALSE	FALSE	0.27	166.94	0.14	46.01	1.96	13.63	TRUE	0.27	-0.8	-0.04	-0.03	-0.05
TCGA-B0-4847-01A-01R-1277-07	FALSE	FALSE	0.27	145.59	0	83.68	0.85	15.17	TRUE	0.27	-0.67	0	-0.08	-0.02
TCGA-BP-4982-01A-01R-1334-07	FALSE	FALSE	0.27	39.5	0.01	-1.11	-0.72	-0.5	FALSE	0.16	0.27	-0.03	0.09	0
TCGA-BP-4999-01A-01R-1334-07	FALSE	FALSE	0.27	-65.07	0.17	-15.76	0.1	-2.79	FALSE	0.06	0.27	0	0.05	0
TCGA-BP-5185-01A-01R-1426-07	FALSE	FALSE	0.27	-103.27	1	-27.68	0.46	1.2	FALSE	0.12	0.27	0.03	-0.01	0.02
TCGA-CW-5587-01A-01R-1541-07	FALSE	FALSE	0.27	368.63	0	61.94	0.97	18.15	TRUE	0.27	-0.61	-0.05	-0.02	-0.02
TCGA-BP-5200-01A-01R-1426-07	FALSE	FALSE	0.26	45.84	0	19.59	1.45	6.04	FALSE	0.35	0.26	0.01	0.07	-0.03
TCGA-A3-A6NI-01A-11R-A33J-07	FALSE	FALSE	0.26	9.99	1	1.63	-0.18	-3.4	FALSE	-0.04	0.26	0.02	0.03	-0.01
TCGA-B0-4810-01A-01R-1503-07	FALSE	FALSE	0.26	34.69	0	29.95	0.27	10.33	TRUE	0.26	0.71	0.02	0.12	-0.03
TCGA-B2-5635-01A-01R-1541-07	FALSE	FALSE	0.26	185.68	0	77.64	-0.13	8.27	TRUE	0.26	-0.38	-0.03	0.01	-0.03
TCGA-B0-4833-01A-01R-1305-07	FALSE	FALSE	0.26	10.89	0.05	34.81	0.24	10.88	TRUE	0.26	-0.35	0	-0.04	-0.01
TCGA-CJ-4892-01A-01R-1305-07	FALSE	FALSE	0.26	24.45	0.37	43.83	-0.32	22	TRUE	0.26	-0.01	0	0.01	-0.02
TCGA-AK-3453-01A-02R-1277-07	FALSE	FALSE	0.26	118.73	0	75.22	0.82	16.79	TRUE	0.26	-0.63	0	-0.08	-0.02
TCGA-BP-4163-01A-02R-1325-07	FALSE	FALSE	0.26	-35.28	1	-14.28	-0.67	-1.05	FALSE	-0.13	0.26	-0.02	0.06	0
TCGA-B2-3924-01A-02R-1325-07	FALSE	FALSE	0.25	555.84	0.04	160.13	2.96	27.16	TRUE	0.25	-0.64	-0.02	-0.05	-0.03
TCGA-CJ-4900-01A-01R-1334-07	FALSE	FALSE	0.25	193.22	0	72.85	-0.32	16.04	TRUE	0.25	-0.4	-0.02	-0.02	-0.02
TCGA-B8-5162-01A-01R-1420-07	FALSE	FALSE	0.25	497.97	0	57.21	1.54	17.53	TRUE	0.25	-0.01	-0.03	0.04	0
TCGA-A3-3306-01A-01R-0864-07	FALSE	FALSE	0.25	17.37	1	-27.01	-0.12	-1.95	FALSE	-0.51	0.25	0.03	-0.02	0.02
TCGA-B8-A54D-01A-21R-A266-07	FALSE	FALSE	0.25	164.05	0	59.23	-0.23	26.12	TRUE	0.25	-0.88	-0.04	-0.07	-0.02
TCGA-BP-5000-01A-01R-1334-07	FALSE	FALSE	0.25	37.3	0.01	26.34	-0.52	4.21	TRUE	0.25	0.56	0.02	0.08	-0.01
TCGA-BP-5199-01A-01R-1426-07	FALSE	FALSE	0.25	69.06	0	55.55	-0.67	31.7	TRUE	0.25	0.52	0.01	0.09	-0.02
TCGA-BP-4341-01A-01R-1289-07	FALSE	FALSE	0.25	-122.83	0.9	-17.01	0.09	-3.38	FALSE	0	0.25	0.02	0	0.02
TCGA-CZ-4862-01A-01R-1305-07	FALSE	FALSE	0.25	307.05	0	123.63	2.73	24.28	TRUE	0.25	-0.88	-0.05	-0.03	-0.05
TCGA-CW-5585-01A-01R-1541-07	FALSE	FALSE	0.24	-101.58	1	-9.76	-0.3	-3.29	FALSE	-0.02	0.24	0	0.02	0.02
TCGA-BP-4962-01A-01R-1334-07	FALSE	FALSE	0.24	140.34	0.38	38.3	0.19	9.11	TRUE	0.24	0.29	-0.03	0.06	0.01
TCGA-BP-4970-01A-01R-1334-07	FALSE	FALSE	0.24	224.56	0	48.95	2.29	4.49	TRUE	0.24	0.03	-0.03	0.07	-0.03
TCGA-CW-5583-01A-02R-1541-07	FALSE	FALSE	0.24	-102.61	1	-14.09	-0.52	-1.98	FALSE	-0.03	0.24	0.01	0.02	0.01
TCGA-AK-3461-01A-02R-1277-07	FALSE	FALSE	0.24	-53.28	0.88	-8.99	0.25	-1.53	FALSE	0	0.24	0.02	0.06	-0.03
TCGA-CW-5589-01A-01R-1541-07	FALSE	FALSE	0.24	76.7	0	-6.05	-0.51	-2.57	FALSE	0.11	0.24	0	0.03	0.01
TCGA-AK-3426-01A-02R-1325-07	FALSE	FALSE	0.24	173.12	0	93.86	0.35	39.07	TRUE	0.24	-0.08	-0.01	0.01	-0.01
TCGA-CJ-4886-01A-01R-1305-07	FALSE	FALSE	0.24	59.36	0	45.79	0.11	4.03	TRUE	0.24	0.48	0	0.08	0
TCGA-BP-5007-01A-01R-1334-07	FALSE	FALSE	0.24	-8.81	0	4.64	-0.16	2.2	FALSE	0.16	0.24	0.01	0.04	-0.01
TCGA-CZ-5462-01A-01R-1503-07	FALSE	FALSE	0.23	41.64	0.97	15.48	0.9	-2.42	FALSE	-0.02	0.23	-0.02	0.08	-0.02
TCGA-B0-5121-01A-02R-1420-07	FALSE	FALSE	0.23	-87.33	0	-9.75	0.09	0.16	TRUE	0.23	0.06	0	0	0.01
TCGA-CJ-4890-01A-01R-1305-07	FALSE	FALSE	0.23	325.12	0	44.36	0.83	22.71	TRUE	0.23	0.07	-0.03	0.06	-0.01
TCGA-B0-4815-01A-01R-1503-07	FALSE	FALSE	0.22	166.96	0	72.61	1.52	26.11	TRUE	0.22	-0.34	-0.01	-0.01	-0.03
TCGA-CJ-5671-01A-11R-1541-07	FALSE	FALSE	0.22	140.78	0	13.61	-0.13	1.9	TRUE	0.22	0.51	-0.01	0.09	-0.01
TCGA-B0-4817-01A-01R-1277-07	FALSE	FALSE	0.22	-103.97	0.91	-23.39	-0.42	-1.77	FALSE	0.03	0.22	0	0.08	-0.03
TCGA-B0-5107-01A-01R-1420-07	FALSE	FALSE	0.22	6.1	1	11.59	-0.26	12.35	FALSE	-0.1	0.22	0.03	0	-0.01
TCGA-B0-5110-01A-01R-1420-07	FALSE	FALSE	0.22	-24.28	0.4	3.76	0.13	-1.52	FALSE	0.03	0.22	0.01	0.04	-0.01
TCGA-BP-5004-01A-01R-1334-07	FALSE	FALSE	0.21	-17.8	1	-10.53	-0.8	-0.29	FALSE	-0.2	0.21	-0.01	0.04	0
TCGA-DV-A4VX-01A-11R-A266-07	FALSE	FALSE	0.21	-116.42	0.68	-22.15	-0.22	2.01	FALSE	-0.09	0.21	-0.01	0.06	-0.01
TCGA-B0-4700-01A-02R-1541-07	FALSE	FALSE	0.21	97.28	0	74.57	1.16	22.02	TRUE	0.21	0.46	0.01	0.09	-0.03
TCGA-BP-4981-01A-01R-1334-07	FALSE	FALSE	0.21	-17.72	0.4	22.15	-0.49	-0.29	FALSE	0.13	0.21	0.03	0.01	-0.01
TCGA-CZ-4860-01A-01R-1305-07	FALSE	FALSE	0.21	-48.55	0.96	-13.82	-0.16	-1.27	FALSE	-0.2	0.21	0.01	0.03	-0.01
TCGA-BP-4774-01A-01R-1289-07	FALSE	FALSE	0.21	-62.61	1	2.65	-0.41	-0.52	FALSE	0.1	0.21	0.02	0.04	-0.02
TCGA-B0-4828-01A-01R-1277-07	FALSE	FALSE	0.21	-98.17	1	-18.41	-0.35	-0.34	FALSE	-0.13	0.21	0.05	-0.02	-0.01
TCGA-BP-5006-01A-01R-1334-07	FALSE	FALSE	0.2	-7	1	-11.19	-0.36	-2.73	FALSE	-0.08	0.2	0.01	0.01	0.01
TCGA-A3-3319-01A-02R-1325-07	FALSE	FALSE	0.2	-5.33	1	-31.93	-0.74	-0.51	FALSE	-0.06	0.2	0.01	0.05	-0.03
TCGA-B0-5099-01A-01R-1420-07	FALSE	FALSE	0.2	-138.92	1	-30.53	-0.47	-3.35	FALSE	-0.16	0.2	0.03	0.01	-0.01
TCGA-B0-5701-01A-11R-1541-07	FALSE	FALSE	0.2	3.14	0.05	-2.72	-0.53	0.33	FALSE	-0.14	0.2	-0.02	0.06	-0.02
TCGA-B0-5700-01A-11R-1541-07	FALSE	FALSE	0.19	-1.61	1	34.55	-0.08	-1.56	FALSE	0.13	0.19	0.01	0.03	-0.01
TCGA-B0-4827-01A-02R-1420-07	FALSE	FALSE	0.19	58.19	0	8.38	-0.36	4.24	TRUE	0.19	0.45	-0.01	0.11	-0.03
TCGA-BP-5178-01A-01R-1426-07	FALSE	FALSE	0.19	69.81	0	9.86	-0.26	-0.42	FALSE	0.09	0.19	0	0.05	-0.02
TCGA-A3-3359-01A-01R-0864-07	FALSE	FALSE	0.19	109.2	0.91	28.27	0.34	7.24	TRUE	0.19	-0.51	-0.04	-0.02	-0.01
TCGA-CZ-5453-01A-01R-1503-07	FALSE	FALSE	0.19	-107.54	1	-19.17	0.62	-3.33	FALSE	-0.2	0.19	0.03	0	0
TCGA-B2-4101-01A-02R-1277-07	FALSE	FALSE	0.19	42.42	0	22.03	0.65	2.87	TRUE	0.19	-0.22	-0.02	-0.01	0
TCGA-AK-3451-01A-02R-1188-07	FALSE	FALSE	0.19	64.13	1	3.86	0	7.09	FALSE	-0.18	0.19	0	0.01	0.01
TCGA-BP-4165-01A-02R-1289-07	FALSE	FALSE	0.19	-38.25	0	19.66	-0.18	2.16	TRUE	0.19	0.28	0.02	0.02	0
TCGA-A3-3323-01A-02R-1325-07	FALSE	FALSE	0.19	65.31	0.88	10.48	-0.95	-0.65	FALSE	0.2	0.19	-0.01	0.04	0
TCGA-A3-3383-01A-02R-1325-07	FALSE	FALSE	0.19	135.1	1	73.29	-0.14	0.58	FALSE	0.01	0.19	0.03	-0.01	0
TCGA-B0-4824-01A-01R-1277-07	FALSE	FALSE	0.19	162.81	0	86.52	1.19	14.62	TRUE	0.19	-0.8	-0.04	-0.06	-0.02
TCGA-CW-6093-01A-11R-1672-07	FALSE	FALSE	0.19	-106.31	0	-23.61	-0.55	-3.17	FALSE	-0.09	0.19	0.02	0.01	0.01
TCGA-B8-5553-01A-01R-1541-07	FALSE	FALSE	0.19	129.37	0	47.71	0	5.73	TRUE	0.19	-0.4	-0.02	0.01	-0.04
TCGA-BP-4167-01A-02R-1325-07	FALSE	FALSE	0.18	209.28	0	56.58	0.09	13.78	TRUE	0.18	0.32	-0.01	0.06	0
TCGA-CJ-4891-01A-01R-1305-07	FALSE	FALSE	0.18	-83.47	0	-9.58	0.22	-1.08	FALSE	0.04	0.18	-0.01	0.06	-0.02
TCGA-B0-5096-01A-01R-1420-07	FALSE	FALSE	0.18	18.32	0	-14.63	-0.71	-0.84	FALSE	-0.3	0.18	0	0.06	-0.03
TCGA-BP-5183-01A-01R-1426-07	FALSE	FALSE	0.18	116.75	0.03	45.29	-0.44	6.64	TRUE	0.18	-0.14	-0.01	0	-0.02
TCGA-BP-5008-01A-01R-1334-07	FALSE	FALSE	0.18	12.95	0.16	3.84	0.94	4.3	FALSE	0.08	0.18	0	0.07	-0.05
TCGA-BP-5191-01A-01R-1426-07	FALSE	FALSE	0.18	154.9	0	30.46	0.47	2.1	TRUE	0.18	-0.19	-0.01	0	-0.02
TCGA-BP-4976-01A-01R-1334-07	FALSE	FALSE	0.17	-61.09	1	-19.99	-0.66	-3.22	FALSE	-0.17	0.17	0	0	0.03
TCGA-CJ-4878-01A-01R-1305-07	FALSE	FALSE	0.17	-87.57	1	-18.37	0.54	-3.44	FALSE	-0.17	0.17	0.03	0.03	-0.03
TCGA-CJ-6028-01A-11R-1672-07	FALSE	FALSE	0.17	100.09	0	32.19	3.14	18.39	TRUE	0.17	-0.21	-0.04	0.04	-0.03
TCGA-CJ-4868-01A-01R-1305-07	FALSE	FALSE	0.17	35.72	0	25.82	0.36	7.52	TRUE	0.17	0.79	0.02	0.14	-0.04
TCGA-DV-A4W0-01A-11R-A266-07	FALSE	FALSE	0.16	-73.99	0.98	-14.44	-0.61	-2.33	FALSE	-0.23	0.16	0.02	0.06	-0.04
TCGA-CJ-4873-01A-01R-1305-07	FALSE	FALSE	0.16	159.97	0	60.83	0.1	4.19	TRUE	0.16	-0.03	-0.01	0.02	-0.01
TCGA-BP-4338-01A-01R-1289-07	FALSE	FALSE	0.16	-65.26	0.02	-29.79	0.95	-1.58	FALSE	-0.02	0.16	0	0.05	-0.03
TCGA-B8-A54I-01A-21R-A33J-07	FALSE	FALSE	0.16	64.82	0	3.32	1.03	-0.76	FALSE	0.28	0.16	0	0.05	-0.03
TCGA-CJ-5675-01A-11R-1541-07	FALSE	FALSE	0.16	405.37	0	120.66	1.02	44.69	TRUE	0.16	-0.33	-0.02	-0.01	-0.02
TCGA-CJ-5684-01A-11R-1541-07	FALSE	FALSE	0.16	64.41	1	48.56	-0.36	6.68	TRUE	0.16	0.13	0.02	-0.01	0.01
TCGA-BP-5182-01A-01R-1426-07	FALSE	FALSE	0.16	210.81	0	55.57	0.52	3.02	FALSE	0.14	0.16	-0.03	0.05	0
TCGA-CJ-6031-01A-11R-1672-07	FALSE	FALSE	0.15	88.99	0	23.02	-0.52	7.25	TRUE	0.15	0.44	-0.01	0.08	0
TCGA-BP-4972-01A-01R-1334-07	FALSE	FALSE	0.15	103.24	0	18.21	1.07	-0.79	FALSE	0.14	0.15	-0.04	0.06	0
TCGA-BP-5180-01A-01R-1426-07	FALSE	FALSE	0.15	150.15	1	13.07	-0.49	1.24	FALSE	-0.02	0.15	0.01	0.02	-0.02
TCGA-AK-3427-01A-01R-0864-07	FALSE	FALSE	0.15	-145.81	1	-50.43	0.51	-2.45	FALSE	-0.3	0.15	0.02	-0.02	0.02
TCGA-BP-4777-01A-01R-1289-07	FALSE	FALSE	0.15	244.38	0	59.01	0.9	22.31	TRUE	0.15	-0.45	-0.05	-0.02	-0.01
TCGA-CJ-5689-01A-11R-1541-07	FALSE	FALSE	0.15	-23.31	0	17.92	-0.11	2.73	TRUE	0.15	0.81	-0.02	0.15	-0.01
TCGA-BP-4965-01A-01R-1334-07	FALSE	FALSE	0.14	-14.41	0	3.11	0.3	-1.53	FALSE	-0.12	0.14	-0.01	0.04	0
TCGA-CZ-5455-01A-01R-1503-07	FALSE	FALSE	0.14	341.31	0	70.78	3.6	19.71	TRUE	0.14	-0.66	-0.04	-0.01	-0.04
TCGA-CJ-4872-01A-01R-1305-07	FALSE	FALSE	0.14	46.18	0	27.29	-0.13	1.06	TRUE	0.14	0.99	0.04	0.11	0.01
TCGA-B0-4849-01A-01R-1277-07	FALSE	FALSE	0.13	5.65	0.72	1.26	-0.17	-0.95	FALSE	0.08	0.13	0.04	0.01	-0.03
TCGA-BP-4768-01A-01R-1289-07	FALSE	FALSE	0.13	-96.78	1	-30.98	-0.68	-0.47	FALSE	-0.2	0.13	0	0.02	-0.01
TCGA-BP-5196-01A-01R-1426-07	FALSE	FALSE	0.13	7.25	0	23.55	-0.6	12.1	TRUE	0.13	1.21	0.05	0.15	-0.02
TCGA-CW-6097-01A-11R-1672-07	FALSE	FALSE	0.13	132.02	0	24.7	0.16	5.4	TRUE	0.13	0.41	-0.01	0.09	-0.02
TCGA-B0-4694-01A-01R-1277-07	FALSE	FALSE	0.12	350.83	0	54.92	0.16	15.57	TRUE	0.12	0.05	-0.02	0.03	-0.01
TCGA-B4-5832-01A-11R-1672-07	FALSE	FALSE	0.12	-55.29	1	-36.48	0.82	-0.04	FALSE	-0.47	0.12	-0.02	0.04	0
TCGA-BP-4782-01A-02R-1420-07	FALSE	FALSE	0.12	50.46	0	9.15	-0.37	2.52	TRUE	0.12	0.28	0	0.07	-0.03
TCGA-CJ-4893-01A-01R-1305-07	FALSE	FALSE	0.12	157.46	0	40.45	1.23	12.48	TRUE	0.12	-0.32	-0.02	-0.01	-0.01
TCGA-B0-5088-01A-01R-1334-07	FALSE	FALSE	0.12	-13.18	0	10.85	-0.3	-0.17	FALSE	0.19	0.12	-0.02	0.05	-0.01
TCGA-G6-A5PC-01A-11R-A33J-07	FALSE	FALSE	0.12	-84.75	0.14	20.97	-0.13	7.82	FALSE	-0.01	0.12	0	0.02	-0.01
TCGA-CZ-4863-01A-01R-1503-07	FALSE	FALSE	0.12	306.57	0.06	75.65	1.06	29.1	TRUE	0.12	-0.48	-0.04	-0.01	-0.02
TCGA-B0-4811-01A-01R-1503-07	FALSE	FALSE	0.11	-108.8	1	-28.06	-0.52	-2.09	FALSE	-0.01	0.11	0.04	-0.05	0.02
TCGA-BP-5169-01A-01R-1426-07	FALSE	FALSE	0.11	-58.28	0.05	-21.88	-0.3	2.22	TRUE	0.11	0.2	0.01	0.03	-0.01
TCGA-CJ-4640-01A-02R-1325-07	FALSE	FALSE	0.11	565.45	0	130.08	0.54	12.86	TRUE	0.11	-0.28	-0.03	0	-0.02
TCGA-B8-5549-01A-01R-1541-07	FALSE	FALSE	0.11	61.73	0.07	8.29	0.26	7.31	FALSE	0.13	0.11	0	0.05	-0.04
TCGA-BP-5001-01A-01R-1334-07	FALSE	FALSE	0.1	-93.29	1	-3.91	-0.51	3.26	TRUE	0.1	-0.21	-0.01	-0.04	0.01
TCGA-BP-4790-01A-01R-1305-07	FALSE	FALSE	0.1	89.79	0	28.26	-0.26	10.84	FALSE	0.34	0.1	-0.05	0.08	-0.01
TCGA-BP-4991-01A-01R-1334-07	FALSE	FALSE	0.1	-50.47	0	-18.12	-1.06	-3.19	FALSE	0.05	0.1	0	0.03	0
TCGA-AK-3460-01A-02R-1277-07	FALSE	FALSE	0.1	31.72	1	-5.12	-0.15	-0.31	FALSE	-0.13	0.1	0	0.03	-0.01
TCGA-CJ-6030-01A-11R-1672-07	FALSE	FALSE	0.09	308.97	0	76.84	-0.44	5.44	TRUE	0.09	-0.18	-0.04	0.01	-0.01
TCGA-B0-5706-01A-11R-1541-07	FALSE	FALSE	0.09	153.57	0	52.36	1.79	21.36	TRUE	0.09	-0.01	0	0.05	-0.05
TCGA-BP-5174-01A-01R-1426-07	FALSE	FALSE	0.08	-86.51	0	-11.73	-0.31	-0.08	FALSE	-0.1	0.08	-0.01	0.04	-0.01
TCGA-CW-5581-01A-02R-1541-07	FALSE	FALSE	0.08	-43.7	1	-11.86	0.4	-0.7	FALSE	-0.04	0.08	-0.01	0.03	0
TCGA-B0-4818-01A-01R-1503-07	FALSE	FALSE	0.08	51.52	0.99	44.21	0.75	2.18	TRUE	0.08	-0.25	0	-0.01	-0.02
TCGA-AK-3434-01A-02R-1277-07	FALSE	FALSE	0.08	11.42	0.44	24.46	0.24	0.79	TRUE	0.08	0.71	0.04	0.06	0.01
TCGA-CJ-5678-01A-11R-1541-07	FALSE	FALSE	0.08	432.35	0	185.07	0.8	17.38	TRUE	0.08	-0.15	-0.01	0	-0.01
TCGA-CZ-5457-01A-01R-1503-07	FALSE	FALSE	0.08	148.93	1	22.95	0.94	1.7	FALSE	-0.07	0.08	0	-0.02	0.02
TCGA-CJ-4638-01A-02R-1325-07	FALSE	FALSE	0.08	-139.01	0.84	-20.96	-0.48	0.16	FALSE	-0.03	0.08	-0.01	0.03	-0.01
TCGA-BP-4353-01A-02R-1289-07	FALSE	FALSE	0.08	87.97	0	16.72	-0.05	2.61	TRUE	0.08	0.36	-0.02	0.08	0
TCGA-CW-6088-01A-11R-1672-07	FALSE	FALSE	0.08	-72	0	-14.71	-0.48	-2.96	FALSE	-0.02	0.08	0.01	0.01	0.01
TCGA-BP-5190-01A-01R-1426-07	FALSE	FALSE	0.08	-67.45	1	-13.17	-0.12	-1.41	FALSE	-0.02	0.08	-0.03	0.05	0
TCGA-AK-3450-01A-02R-1277-07	FALSE	FALSE	0.08	-59.29	0	-10.94	-0.21	-1.23	FALSE	-0.36	0.08	-0.02	0.04	-0.01
TCGA-B0-5697-01A-11R-1541-07	FALSE	FALSE	0.08	215.62	0	44.19	-0.05	12.01	TRUE	0.08	-0.4	-0.03	0	-0.03
TCGA-A3-3324-01A-02R-1325-07	FALSE	FALSE	0.08	12.73	0.23	-9.15	1.05	3.39	FALSE	-0.01	0.08	0.03	-0.01	0
TCGA-BP-4968-01A-01R-1334-07	FALSE	FALSE	0.07	64.79	1	42.89	0.61	10.6	TRUE	0.07	0.28	0.02	0.02	-0.01
TCGA-B0-5113-01A-01R-1420-07	FALSE	FALSE	0.07	36.6	1	17.7	1.16	1.51	FALSE	-0.02	0.07	0.02	0.02	-0.02
TCGA-AK-3429-01A-02R-1325-07	FALSE	FALSE	0.06	376.89	0	117.54	1.26	23.27	TRUE	0.06	-0.25	0	-0.03	-0.01
TCGA-CZ-4865-01A-02R-1503-07	FALSE	FALSE	0.06	113.96	0	40.31	-0.03	3.79	TRUE	0.06	0.41	-0.01	0.1	-0.03
TCGA-AK-3425-01A-02R-1277-07	FALSE	FALSE	0.06	181.9	0	47.96	-0.29	9.9	TRUE	0.06	0.29	0	0.05	-0.01
TCGA-EU-5904-01A-11R-1672-07	FALSE	FALSE	0.05	-41.45	0.75	9.4	0.67	-0.98	FALSE	0.09	0.05	0	0.05	-0.04
TCGA-B2-4099-01A-02R-1188-07	FALSE	FALSE	0.05	384.8	1	22.11	0.24	-1.26	FALSE	-0.12	0.05	0.01	-0.02	0.01
TCGA-A3-3372-01A-02R-1325-07	FALSE	FALSE	0.05	29.03	0	-6.05	-0.08	-0.14	FALSE	0.14	0.05	0.02	0	-0.01
TCGA-CZ-4858-01A-01R-1305-07	FALSE	FALSE	0.05	174.51	0.97	58.79	-0.29	16.46	TRUE	0.05	0.84	0.05	0.1	-0.01
TCGA-CZ-4856-01A-02R-1426-07	FALSE	FALSE	0.05	136.8	0	36.32	0.14	2.81	FALSE	0.21	0.05	0	0.03	-0.02
TCGA-CJ-5682-01A-11R-1541-07	FALSE	FALSE	0.05	-55.03	0	0.48	-0.58	0.52	TRUE	0.05	1.43	0.04	0.17	0.01
TCGA-CJ-4874-01A-01R-1305-07	FALSE	FALSE	0.05	214.51	0	58.54	0.45	14.35	TRUE	0.05	-0.36	-0.01	-0.02	-0.02
TCGA-CJ-4875-01A-01R-1305-07	FALSE	FALSE	0.05	-52.71	0.01	13.68	-0.73	19.84	TRUE	0.05	0.07	0.01	-0.02	0.02
TCGA-CJ-6027-01A-11R-1672-07	FALSE	FALSE	0.04	126.34	0	57.9	1.64	15.15	TRUE	0.04	0.02	0	0.03	-0.03
TCGA-CZ-5460-01A-01R-1503-07	FALSE	FALSE	0.04	25.72	1	23.16	3.59	7.49	FALSE	0.04	0.04	0.03	0	-0.03
TCGA-B8-4151-01A-01R-1188-07	FALSE	FALSE	0.04	22.91	1	8.48	0.43	-2.05	FALSE	-0.38	0.04	0.02	-0.02	0
TCGA-CZ-5466-01A-01R-1503-07	FALSE	FALSE	0.04	132.75	0	37.24	-0.07	5.2	TRUE	0.04	0.07	-0.01	0.02	0
TCGA-BP-4801-01A-02R-1420-07	FALSE	FALSE	0.04	150.81	0	20.69	0.77	0.15	FALSE	0.13	0.04	-0.03	0.04	-0.01
TCGA-B8-4143-01A-01R-1188-07	FALSE	FALSE	0.04	62.76	0.63	33.07	0.36	19.08	TRUE	0.04	0.11	0.04	0.01	-0.03
TCGA-A3-3335-01A-01R-0864-07	FALSE	FALSE	0.04	19.95	1	-24.32	6.19	-2.07	FALSE	-0.29	0.04	0.01	0.03	-0.04
TCGA-B0-4852-01A-01R-1503-07	FALSE	FALSE	0.04	-20.24	1	-14.94	-0.36	-0.86	FALSE	-0.33	0.04	0.02	-0.01	-0.01
TCGA-B0-4701-01A-01R-1277-07	FALSE	FALSE	0.03	17.42	1	16.22	0.96	2.52	FALSE	-0.13	0.03	0.04	0.01	-0.06
TCGA-BP-5173-01A-01R-1426-07	FALSE	FALSE	0.03	155.69	0	81.53	0.62	11.41	FALSE	0.07	0.03	0.01	-0.02	0.01
TCGA-B0-4836-01A-01R-1305-07	FALSE	FALSE	0.03	-14.1	0.99	-8.68	-0.6	7.17	TRUE	0.03	0.94	0.02	0.13	-0.01
TCGA-CJ-4644-01A-02R-1325-07	FALSE	FALSE	0.03	125.64	0.06	33.03	0.7	8.13	TRUE	0.03	-0.13	-0.03	0.01	0
TCGA-BP-4161-01A-02R-1325-07	FALSE	FALSE	0.02	176.55	0	45.5	1.13	8.11	TRUE	0.02	-0.62	-0.05	-0.02	-0.02
TCGA-CZ-5985-01A-11R-1672-07	FALSE	FALSE	0.02	115.61	0	15.16	0.42	1.09	TRUE	0.02	-0.29	-0.05	0.03	-0.02
TCGA-BP-4983-01A-01R-1334-07	FALSE	FALSE	0.02	148.07	0	34.87	74.31	26.65	TRUE	0.02	-0.03	0	0.02	-0.02
TCGA-B0-4691-01A-01R-1277-07	FALSE	FALSE	0.02	-57.01	0.94	2.66	-0.38	8.38	TRUE	0.02	0.66	0.03	0.09	-0.01
TCGA-B0-4821-01A-01R-1503-07	FALSE	FALSE	0.01	-112.48	0.77	-7.37	-0.57	1.61	TRUE	0.01	0.6	0.05	0.05	-0.02
TCGA-DV-5568-01A-01R-1541-07	FALSE	FALSE	0.01	-3.59	0.96	-16.15	1.04	8.34	TRUE	0.01	1.01	0.05	0.11	-0.01
TCGA-B0-5119-01A-02R-1420-07	FALSE	FALSE	0.01	-40.98	1	3.1	0.51	4.87	TRUE	0.01	-0.09	-0.01	0	0
TCGA-B8-A54H-01A-11R-A33J-07	FALSE	FALSE	0.01	-25.58	0.14	1.49	-0.85	7.77	FALSE	0.05	0.01	0.02	-0.01	0
TCGA-CJ-5681-01A-11R-1541-07	FALSE	FALSE	0.01	-89.16	0	-35.83	-0.41	-3.5	FALSE	-0.24	0.01	-0.04	0.02	0.02
TCGA-B8-4622-01A-02R-1277-07	FALSE	FALSE	0.01	58.7	0.41	17.81	-0.74	-1.65	FALSE	0.06	0.01	-0.02	0.03	0
TCGA-B0-4706-01A-01R-1503-07	FALSE	FALSE	0.01	-137.01	1	-26.28	-0.42	2.62	TRUE	0.01	1.05	0.06	0.09	0.01
TCGA-A3-3358-01A-01R-1541-07	FALSE	FALSE	0.01	192.36	0.99	13.22	0.22	6.67	TRUE	0.01	-0.32	-0.03	-0.02	0
TCGA-B2-5633-01A-01R-A277-07	FALSE	FALSE	0	159.09	1	33.68	-0.48	-0.66	FALSE	-0.37	0	-0.01	-0.01	0.02
TCGA-BP-5184-01A-01R-1426-07	FALSE	FALSE	0	4.44	1	0.78	0.32	0.85	TRUE	0	0.88	0.01	0.09	0.03
TCGA-CZ-4859-01A-02R-1426-07	FALSE	FALSE	0	-68.19	1	-4.42	-0.25	-2.04	FALSE	-0.4	0	0.01	-0.02	0
TCGA-EU-5906-01A-11R-1672-07	FALSE	FALSE	0	26.15	0.68	1.83	0	-1.81	FALSE	0.02	0	-0.03	0.06	-0.02
TCGA-BP-4987-01A-01R-1334-07	FALSE	FALSE	0	-22.24	0.97	9.47	-0.27	2.46	TRUE	0	0.04	0.02	-0.03	0.02
TCGA-BP-4969-01A-01R-1334-07	FALSE	TRUE	0	-109.84	1	-23.97	-0.3	-2.81	FALSE	0.01	0	-0.01	-0.02	0.02
TCGA-BP-4160-01A-02R-1289-07	FALSE	TRUE	0	344.66	0.53	83.54	0.43	36.26	TRUE	0	-0.38	-0.02	-0.02	-0.02
TCGA-BP-4331-01A-01R-1289-07	FALSE	TRUE	-0.01	49.89	0.02	4.51	-0.61	-0.88	FALSE	0.19	-0.01	-0.02	0.02	-0.01
TCGA-BP-4354-01A-02R-1289-07	FALSE	TRUE	-0.01	221.03	0	28.9	1.39	-0.33	FALSE	0.13	-0.01	-0.02	0.08	-0.05
TCGA-CJ-4904-01A-02R-1426-07	FALSE	TRUE	-0.01	87.05	0	23.81	0.81	0.58	FALSE	0.16	-0.01	0	0.04	-0.03
TCGA-CJ-4639-01A-02R-1325-07	FALSE	TRUE	-0.01	95.78	0.06	38.45	0.8	11.52	TRUE	-0.01	-0.48	-0.01	-0.05	-0.01
TCGA-BP-4797-01A-01R-1305-07	FALSE	TRUE	-0.01	69.69	0	20.78	-0.14	3.2	FALSE	0.07	-0.01	-0.04	0.05	-0.01
TCGA-CJ-5680-01A-11R-1541-07	FALSE	TRUE	-0.01	-70.39	1	-18.83	-0.61	-2.87	FALSE	-0.13	-0.01	-0.01	0.01	0
TCGA-B2-3924-01A-02R-A277-07	FALSE	TRUE	-0.01	461.65	1	117.74	2.86	17.35	TRUE	-0.01	-0.79	-0.03	-0.08	-0.02
TCGA-BP-4799-01A-01R-1305-07	FALSE	TRUE	-0.01	-39.96	0	34.64	1.01	4.85	TRUE	-0.01	0.25	0	0.07	-0.03
TCGA-CZ-5459-01A-01R-1503-07	FALSE	TRUE	-0.01	44.03	1	14.34	-0.26	2.72	FALSE	-0.09	-0.01	0	0.01	-0.03
TCGA-B0-4690-01A-01R-1277-07	FALSE	TRUE	-0.01	230.63	0.3	35.53	0.42	6.85	TRUE	-0.01	0.29	0.01	0.06	-0.03
TCGA-B0-5703-01A-11R-1541-07	FALSE	TRUE	-0.02	-114.95	1	-10.23	-0.68	1.83	TRUE	-0.02	0.39	0.03	0.03	0
TCGA-BP-4176-01A-02R-1289-07	FALSE	TRUE	-0.02	218.81	0	14.33	0.15	0	FALSE	-0.03	-0.02	-0.03	0.05	-0.02
TCGA-A3-3329-01A-01R-0864-07	FALSE	TRUE	-0.02	173.18	1	6.6	0.1	0.79	FALSE	-0.11	-0.02	0.02	-0.01	-0.01
TCGA-B0-5712-01A-11R-1672-07	FALSE	TRUE	-0.03	-65.3	1	-3.45	0.53	0.93	FALSE	-0.4	-0.03	0	0.01	-0.02
TCGA-BP-4759-01A-01R-1289-07	FALSE	TRUE	-0.03	-102.79	1	-27.02	-0.21	0.68	TRUE	-0.03	0.51	0.03	0.04	0.01
TCGA-B8-5546-01A-01R-1541-07	FALSE	TRUE	-0.03	-96.84	1	-38.49	-0.09	-2.2	FALSE	-0.22	-0.03	-0.03	0	0.02
TCGA-BP-4170-01A-02R-1289-07	FALSE	TRUE	-0.04	189.15	1	43.82	0.35	3.28	FALSE	0.09	-0.04	-0.01	0.03	-0.02
TCGA-CZ-5454-01A-01R-1503-07	FALSE	TRUE	-0.04	200.67	0	43.36	0.86	0.04	FALSE	0.02	-0.04	-0.02	0.02	0
TCGA-CJ-4635-01A-02R-1305-07	FALSE	TRUE	-0.04	90.04	0	6.22	-0.9	14.64	FALSE	0.16	-0.04	-0.01	0.01	-0.01
TCGA-CJ-4643-01A-02R-1325-07	FALSE	TRUE	-0.05	43.43	0	5.11	1.08	-1.15	FALSE	0.11	-0.05	-0.02	0.02	-0.01
TCGA-BP-4335-01A-01R-1289-07	FALSE	TRUE	-0.05	44.78	0.85	25.15	0.95	6.53	FALSE	0.13	-0.05	0.02	0.02	-0.05
TCGA-CW-5591-01A-01R-1541-07	FALSE	TRUE	-0.05	-123.51	0	-40.6	-0.94	-3.31	FALSE	-0.19	-0.05	-0.04	0.03	0
TCGA-BP-4174-01A-02R-1289-07	FALSE	TRUE	-0.05	149.17	1	29.22	3.24	2.32	FALSE	-0.19	-0.05	-0.01	0.01	-0.01
TCGA-CJ-5686-01A-11R-1672-07	FALSE	TRUE	-0.06	96.62	0	-8.05	-0.03	1.16	TRUE	-0.06	-0.02	-0.03	0.05	-0.02
TCGA-B0-4693-01A-01R-1277-07	FALSE	TRUE	-0.06	-13.99	1	4.72	1.18	6.85	TRUE	-0.06	-0.65	0	-0.06	-0.04
TCGA-B0-4816-01A-01R-1503-07	FALSE	TRUE	-0.06	182.33	0.03	38.72	-0.94	-0.74	FALSE	0.2	-0.06	-0.02	0.02	-0.02
TCGA-B8-A54E-01A-11R-A266-07	FALSE	TRUE	-0.06	-96.01	0	-37.71	0.94	-2.39	FALSE	-0.04	-0.06	-0.03	0.02	0
TCGA-B4-5835-01A-11R-1672-07	FALSE	TRUE	-0.07	8.46	0	5.41	-0.09	-1.23	FALSE	-0.06	-0.07	-0.03	0.03	-0.01
TCGA-B0-4699-01A-01R-1277-07	FALSE	TRUE	-0.07	-19.73	0	-12.46	10.49	15.6	TRUE	-0.07	0.15	0	0.05	-0.02
TCGA-B0-4945-01A-01R-1420-07	FALSE	TRUE	-0.08	-77.11	0	-0.17	0.2	-1.42	FALSE	-0.07	-0.08	0.01	0.01	-0.02
TCGA-B0-5707-01A-11R-1541-07	FALSE	TRUE	-0.08	-80.24	0	-30.71	-0.24	-2.44	FALSE	-0.12	-0.08	-0.02	0.02	-0.01
TCGA-B0-4713-01A-01R-1277-07	FALSE	TRUE	-0.08	-85.53	1	-13.32	-0.54	1.14	TRUE	-0.08	0.14	0	0.03	0
TCGA-B0-4698-01A-01R-1503-07	FALSE	TRUE	-0.08	95.11	0.04	51.12	17.65	23.42	TRUE	-0.08	0.31	0.05	0.01	-0.01
TCGA-B0-5713-01A-11R-1672-07	FALSE	TRUE	-0.08	3.29	0.27	-3.26	0.57	-0.08	FALSE	0.04	-0.08	0.01	0	-0.01
TCGA-BP-4164-01A-02R-1325-07	FALSE	TRUE	-0.08	-42.72	1	-19.63	0.83	-0.93	FALSE	-0.31	-0.08	0.03	-0.03	-0.01
TCGA-A3-3322-01A-02R-1325-07	FALSE	TRUE	-0.08	-43.05	1	-16.65	-0.37	-3.34	FALSE	-0.06	-0.08	0	-0.03	0.02
TCGA-BP-4347-01A-01R-1289-07	FALSE	TRUE	-0.08	-36.45	0.08	-2.05	0.68	-1.08	FALSE	0.03	-0.08	0.01	-0.01	0
TCGA-AK-3447-01A-01R-1766-07	FALSE	TRUE	-0.08	-127.47	1	-53.12	0.98	-1.7	FALSE	-0.21	-0.08	0	-0.02	0
TCGA-BP-5202-01A-02R-1426-07	FALSE	TRUE	-0.09	15.1	1	-7.63	0.12	-2.19	FALSE	-0.06	-0.09	-0.01	0.01	-0.01
TCGA-B0-5085-01A-01R-1334-07	FALSE	TRUE	-0.09	-104.76	1	-23.18	0.09	-1.45	FALSE	0.15	-0.09	0	-0.02	0
TCGA-A3-3307-01A-01R-0864-07	FALSE	TRUE	-0.09	75.85	1	19.8	0.57	3.94	TRUE	-0.09	-0.42	-0.01	-0.03	-0.01
TCGA-B0-5083-01A-02R-1420-07	FALSE	TRUE	-0.1	67.61	0.94	-11.06	0.65	0.46	FALSE	0	-0.1	-0.03	0.01	0
TCGA-CJ-4876-01A-01R-1305-07	FALSE	TRUE	-0.1	-59.18	0.06	28.29	0.3	11.64	TRUE	-0.1	0.26	0.04	0.02	-0.02
TCGA-B2-A4SR-01A-11R-A266-07	FALSE	TRUE	-0.12	-25.69	0	-6.42	0.92	-0.37	FALSE	0.17	-0.12	-0.01	-0.01	0
TCGA-CJ-4636-01A-02R-1325-07	FALSE	TRUE	-0.13	143.36	0	38.43	0.05	10.7	FALSE	0.2	-0.13	-0.03	0.02	-0.01
TCGA-CZ-5470-01A-01R-1503-07	FALSE	TRUE	-0.13	172.96	0.11	36.15	1.46	7.16	TRUE	-0.13	-0.2	-0.01	-0.01	-0.01
TCGA-CZ-4866-01A-01R-1503-07	FALSE	TRUE	-0.13	-1.59	1	-14.47	0.49	-2.28	FALSE	-0.27	-0.13	-0.05	0.02	0.01
TCGA-CJ-4903-01A-01R-1426-07	FALSE	TRUE	-0.15	66.37	1	27.36	0.32	3.67	FALSE	0.03	-0.15	0	-0.01	-0.01
TCGA-AK-3455-01A-01R-0864-07	FALSE	TRUE	-0.17	179.37	1	76.88	-0.09	42.23	TRUE	-0.17	-0.42	-0.01	-0.03	-0.02
TCGA-BP-4959-01A-01R-1334-07	FALSE	TRUE	-0.17	78.63	0.01	16.13	-0.29	-0.04	FALSE	0.08	-0.17	-0.04	0	0.01
TCGA-CZ-5986-01A-11R-1672-07	FALSE	TRUE	-0.18	33.58	1	7.86	2.76	-2.87	FALSE	-0.18	-0.18	0.02	-0.02	-0.02
TCGA-CZ-4853-01A-01R-1426-07	FALSE	TRUE	-0.18	10.32	1	-18.63	1.11	-2.8	FALSE	-0.04	-0.18	0	-0.03	0
TCGA-B0-5109-01A-02R-1420-07	FALSE	TRUE	-0.18	-77.07	1	-11.97	0.21	11.78	TRUE	-0.18	0.49	0.07	0	0
TCGA-A3-A8OV-01A-11R-A37O-07	FALSE	TRUE	-0.21	31.38	1	24.63	-0.18	-2.81	FALSE	-0.15	-0.21	0.01	-0.03	-0.01
TCGA-A3-A8OW-01A-11R-A37O-07	FALSE	TRUE	-0.21	-38.32	0	27.52	0.13	2.81	FALSE	0.2	-0.21	0	-0.03	0
TCGA-B4-5377-01A-01R-1503-07	FALSE	TRUE	-0.22	46.59	1	9.74	0.7	3.41	FALSE	-0.09	-0.22	0	-0.02	-0.02
TCGA-CZ-5989-01A-11R-1672-07	FALSE	TRUE	-0.22	15.29	1	-17.2	4.1	8.64	FALSE	-0.4	-0.22	-0.01	-0.01	0
TCGA-A3-3385-01A-02R-1420-07	FALSE	TRUE	-0.22	-78.2	1	-28.55	0.39	-3.06	FALSE	-0.33	-0.22	0	-0.06	0.02
TCGA-B2-5641-01A-01R-1541-07	FALSE	TRUE	-0.23	296.81	0	57.18	-0.06	16	FALSE	0.29	-0.23	-0.03	0.01	-0.01
TCGA-CJ-6032-01A-11R-1672-07	FALSE	TRUE	-0.23	-38.55	0.59	3.57	0	2.3	FALSE	-0.13	-0.23	-0.01	0	-0.03
TCGA-A3-3311-01A-02R-1325-07	FALSE	TRUE	-0.23	52.14	0.97	11.05	-0.08	1.49	FALSE	-0.21	-0.23	-0.04	0.02	-0.01
TCGA-BP-4775-01A-01R-1289-07	FALSE	TRUE	-0.23	-35.16	1	-15.87	0.51	-2.06	FALSE	-0.04	-0.23	-0.01	-0.01	-0.02
TCGA-A3-3363-01A-01R-0864-07	FALSE	TRUE	-0.23	37.15	1	-13.05	-0.12	-2.59	FALSE	-0.16	-0.23	-0.04	0	0
TCGA-BP-4340-01A-01R-1289-07	FALSE	TRUE	-0.25	-12.64	1	-18.89	-0.55	-2.91	FALSE	-0.05	-0.25	-0.01	-0.02	0
TCGA-B8-4154-01A-01R-1188-07	FALSE	TRUE	-0.25	191.79	1	20.14	0.22	2.77	TRUE	-0.25	0.19	0.02	-0.01	0.02
TCGA-B0-5075-01A-01R-1334-07	FALSE	TRUE	-0.26	143.38	0	15.61	0.3	5.25	FALSE	0.08	-0.26	-0.04	0.01	-0.01
TCGA-BP-4798-01A-01R-1305-07	FALSE	TRUE	-0.26	476.25	0	107.51	0.46	44.65	FALSE	0.44	-0.26	-0.02	-0.01	-0.03
TCGA-AK-3458-01A-01R-1503-07	FALSE	TRUE	-0.26	37.58	1	-19.46	-0.44	2.08	TRUE	-0.26	0.52	0.04	0.01	0.03
TCGA-BP-4973-01A-01R-1334-07	FALSE	TRUE	-0.26	44.43	1	3.66	0.49	3.14	FALSE	0.05	-0.26	0.01	-0.03	-0.02
TCGA-AS-3777-01A-01R-0864-07	FALSE	TRUE	-0.26	-141	1	-46.59	0.1	-2.33	FALSE	-0.02	-0.26	-0.02	-0.01	-0.01
TCGA-BP-4766-01A-01R-1289-07	FALSE	TRUE	-0.26	-58.42	0	-35.67	-1.06	-3.68	FALSE	-0.05	-0.26	-0.04	0	0
TCGA-AK-3456-01A-02R-1325-07	FALSE	TRUE	-0.26	-28.45	0.01	-38.15	3.5	-2.86	FALSE	-0.2	-0.26	-0.06	0.01	0.01
TCGA-BP-4963-01A-01R-1334-07	FALSE	TRUE	-0.27	73.89	0.13	14.9	-0.96	0.06	FALSE	0.29	-0.27	-0.03	-0.01	0
TCGA-B0-5698-01A-11R-1672-07	FALSE	TRUE	-0.29	159.63	0.04	26.18	0.39	1.37	FALSE	0.15	-0.29	0	0	-0.05
TCGA-A3-3367-01A-02R-1420-07	FALSE	TRUE	-0.29	38.64	1	-1.3	0.88	-2.17	FALSE	-0.22	-0.29	0	-0.05	0
TCGA-A3-3352-01A-01R-0864-07	FALSE	TRUE	-0.3	13.5	1	-1.24	0.3	-2.52	FALSE	-0.06	-0.3	0.01	-0.07	0.02
TCGA-B8-5159-01A-01R-1420-07	FALSE	TRUE	-0.31	-10.15	1	11.46	0.43	7.51	FALSE	-0.15	-0.31	-0.02	-0.02	0
TCGA-CZ-5451-01A-01R-1503-07	FALSE	TRUE	-0.31	29.69	0.46	3.14	0.17	-0.29	FALSE	0.09	-0.31	-0.02	-0.01	-0.02
TCGA-B0-5104-01A-01R-1420-07	FALSE	TRUE	-0.31	-50.27	1	-8.34	-0.17	-2.33	FALSE	-0.1	-0.31	-0.02	-0.01	-0.02
TCGA-A3-3313-01A-02R-1325-07	FALSE	TRUE	-0.32	-121.4	1	-48.98	6.82	-3.48	FALSE	-0.27	-0.32	-0.03	-0.04	0.02
TCGA-A3-3378-01A-02R-1325-07	FALSE	TRUE	-0.32	222.16	0	17.38	2.32	5.38	FALSE	0.24	-0.32	-0.06	0.05	-0.04
TCGA-B8-4621-01A-01R-1503-07	FALSE	TRUE	-0.33	-33.03	0	-14.47	-0.41	-1.48	FALSE	-0.03	-0.33	-0.05	0.01	-0.01
TCGA-B2-4098-01A-02R-1325-07	FALSE	TRUE	-0.33	-35.7	0	-16.84	3.04	-2.36	FALSE	-0.09	-0.33	-0.04	0.01	-0.01
TCGA-A3-3373-01A-02R-1420-07	FALSE	TRUE	-0.36	44.97	0	12.21	0.2	-1.98	FALSE	-0.06	-0.36	-0.05	0.01	-0.01
TCGA-BP-4977-01A-01R-1334-07	FALSE	TRUE	-0.38	11.66	0.98	0.26	-0.28	-1.68	FALSE	-0.02	-0.38	-0.04	0.01	-0.03
TCGA-A3-3331-01A-02R-1325-07	FALSE	TRUE	-0.39	56.36	0.99	17.77	-0.05	0.14	FALSE	0.1	-0.39	-0.03	0	-0.03
TCGA-B2-3923-01A-02R-A277-07	FALSE	TRUE	-0.39	-101.21	1	-50.67	3.1	-3.26	FALSE	-0.38	-0.39	-0.02	-0.06	0.01
TCGA-A3-3374-01A-02R-1325-07	FALSE	TRUE	-0.4	-17.02	0	-24.66	7.29	-2.27	FALSE	0.08	-0.4	-0.05	-0.01	-0.01
TCGA-AK-3465-01A-02R-1325-07	FALSE	TRUE	-0.42	-133.64	1	-55.58	0.44	-3.23	FALSE	-0.16	-0.42	-0.01	-0.05	0
TCGA-CZ-5452-01A-01R-1503-07	FALSE	TRUE	-0.42	275.5	0	87.49	0.23	29.85	FALSE	0.24	-0.42	-0.02	-0.03	-0.02
TCGA-A3-3320-01A-02R-1325-07	FALSE	TRUE	-0.43	-21.61	1	-3.01	0.17	-1.1	FALSE	-0.08	-0.43	-0.02	-0.03	-0.01
TCGA-CJ-4884-01A-01R-1305-07	FALSE	TRUE	-0.43	90.75	0	21.09	0.48	5.96	FALSE	0.04	-0.43	-0.04	-0.02	0
TCGA-B2-5633-01B-04R-A277-07	FALSE	TRUE	-0.44	-31.35	0	-32.5	-0.37	-2.33	FALSE	-0.08	-0.44	-0.05	-0.03	0.01
TCGA-CZ-4861-01A-01R-1305-07	FALSE	TRUE	-0.44	249.56	1	41.2	1.53	1.36	FALSE	-0.05	-0.44	-0.03	-0.01	-0.03
TCGA-A3-3328-01A-01R-0864-07	FALSE	TRUE	-0.44	-166.27	1	-47.57	0.86	-3.08	FALSE	-0.2	-0.44	-0.02	-0.05	0
TCGA-A3-3343-01A-01R-0864-07	FALSE	TRUE	-0.44	145.58	0.19	23.53	0.07	-1.85	FALSE	-0.04	-0.44	-0.02	-0.03	-0.02
TCGA-B2-5639-01A-01R-1541-07	FALSE	TRUE	-0.45	61.57	0.16	33.75	0.2	-1.67	FALSE	-0.12	-0.45	-0.03	-0.03	-0.01
TCGA-B8-4619-01A-02R-1325-07	FALSE	TRUE	-0.45	-147.63	1	-42.22	0.36	-2.88	FALSE	-0.17	-0.45	-0.02	-0.06	0.01
TCGA-BP-4994-01A-01R-1334-07	FALSE	TRUE	-0.46	-83.12	1	-33.15	0.29	-1.26	FALSE	-0.13	-0.46	-0.02	-0.04	-0.01
TCGA-BP-4995-01A-01R-1334-07	FALSE	TRUE	-0.46	-45.46	1	-21.47	0.43	-0.01	FALSE	-0.16	-0.46	-0.02	-0.04	-0.01
TCGA-CJ-5672-01A-11R-1541-07	FALSE	TRUE	-0.46	389.86	0	89.25	0.45	23.76	FALSE	0.36	-0.46	-0.03	-0.02	-0.01
TCGA-B0-5705-01A-11R-1541-07	FALSE	TRUE	-0.46	146.26	0.95	63.05	1.11	3.58	FALSE	0.1	-0.46	-0.02	-0.04	-0.01
TCGA-BP-4756-01A-01R-1289-07	FALSE	TRUE	-0.46	-90.48	0	-35.5	3.59	0.07	FALSE	-0.12	-0.46	-0.04	-0.04	0
TCGA-CJ-4894-01A-01R-1305-07	FALSE	TRUE	-0.47	187.95	0	85.72	0.26	21.74	FALSE	0.25	-0.47	-0.01	-0.06	-0.01
TCGA-B2-3923-01B-10R-A277-07	FALSE	TRUE	-0.47	-141.8	1	-57.46	7.2	-3.38	FALSE	-0.34	-0.47	-0.03	-0.05	0.01
TCGA-AK-3443-01A-02R-1325-07	FALSE	TRUE	-0.49	-147.87	1	-36.63	3.5	-2.77	FALSE	-0.21	-0.49	-0.02	-0.05	-0.01
TCGA-B2-5635-01A-01R-A277-07	FALSE	TRUE	-0.49	217.79	1	62.88	0.73	4.33	FALSE	-0.27	-0.49	-0.03	-0.03	-0.01
TCGA-B0-4846-01A-01R-1277-07	FALSE	TRUE	-0.5	229.06	0	76.04	3.39	5.75	FALSE	0.05	-0.5	-0.02	0	-0.05
TCGA-B8-4146-01B-11R-1672-07	FALSE	TRUE	-0.51	76.18	1	-1.32	6.33	3.32	FALSE	-0.53	-0.51	-0.02	-0.02	-0.03
TCGA-AK-3440-01A-02R-1277-07	FALSE	TRUE	-0.51	-145.59	1	-47.57	3.88	-2.65	FALSE	-0.15	-0.51	-0.02	-0.03	-0.02
TCGA-CZ-5463-01A-01R-1503-07	FALSE	TRUE	-0.53	93.36	1	36.08	0.89	1.14	FALSE	-0.33	-0.53	0	-0.07	-0.01
TCGA-AK-3433-01A-02R-1277-07	FALSE	TRUE	-0.53	-129.15	1	-50.87	0.87	-2.78	FALSE	-0.16	-0.53	-0.02	-0.07	0
TCGA-B2-3923-01A-02R-1325-07	FALSE	TRUE	-0.53	-114.66	1	-51.62	2.78	-2.89	FALSE	-0.17	-0.53	-0.03	-0.06	0
TCGA-BP-4334-01A-01R-1289-07	FALSE	TRUE	-0.53	-156.35	1	-40.76	0.77	-2.67	FALSE	0.01	-0.53	-0.01	-0.05	-0.01
TCGA-B0-4834-01A-01R-1305-07	FALSE	TRUE	-0.55	-167.45	1	-50.1	3.02	-2.79	FALSE	-0.2	-0.55	-0.02	-0.06	0
TCGA-B0-5117-01A-01R-1420-07	FALSE	TRUE	-0.55	-159.61	1	-54.02	1.14	-2.76	FALSE	-0.08	-0.55	-0.02	-0.06	0
TCGA-B0-4838-01A-01R-1305-07	FALSE	TRUE	-0.55	190.36	0.03	50.69	2.57	44.53	FALSE	0.18	-0.55	0	-0.05	-0.03
TCGA-B0-5699-01A-11R-1541-07	FALSE	TRUE	-0.59	20.63	0.98	-4.19	-0.22	-2.09	FALSE	-0.16	-0.59	-0.01	-0.05	-0.02
TCGA-B8-A54G-01A-11R-A266-07	FALSE	TRUE	-0.6	613.26	0	195.88	-0.16	39.38	FALSE	0.33	-0.6	-0.04	-0.03	-0.02
TCGA-CJ-4641-01A-02R-1325-07	FALSE	TRUE	-0.62	220.14	0	83.94	1.08	17.43	FALSE	0.28	-0.62	-0.06	-0.01	-0.03
TCGA-B2-4102-01A-02R-1325-07	FALSE	TRUE	-0.69	105.36	0.03	13.69	0.24	-2.44	FALSE	0.09	-0.69	-0.05	-0.04	-0.01
TCGA-A3-3351-01A-02R-1325-07	FALSE	TRUE	-0.71	232.65	0	80.74	0.33	16.26	FALSE	0.34	-0.71	-0.03	-0.04	-0.03
TCGA-A3-3370-01A-02R-1420-07	FALSE	TRUE	-0.71	145.79	0	49.57	1.34	11.99	FALSE	0.25	-0.71	-0.03	-0.04	-0.03
TCGA-B2-3924-01B-03R-A277-07	FALSE	TRUE	-0.79	33.68	0.42	3.27	3.89	5.37	FALSE	-0.08	-0.79	-0.03	-0.07	-0.01
TCGA-CZ-4864-01A-01R-1503-07	FALSE	TRUE	-0.79	390.89	0	134.23	2.18	15.02	FALSE	0.29	-0.79	-0.03	-0.06	-0.03
TCGA-BP-4325-01A-02R-1289-07	FALSE	TRUE	-0.82	107.34	1	30.48	1.32	11.71	FALSE	-0.09	-0.82	-0.03	-0.07	-0.03
TCGA-A3-3357-01A-02R-1420-07	FALSE	TRUE	-0.82	41.17	0.02	23.19	0.08	4.36	FALSE	-0.02	-0.82	-0.05	-0.05	-0.03
TCGA-B2-5635-01B-04R-A277-07	FALSE	TRUE	-0.83	9.63	0.87	-17.55	0.63	4.82	FALSE	-0.19	-0.83	-0.05	-0.06	-0.01
TCGA-A3-3326-01A-01R-0864-07	FALSE	TRUE	-1.06	223.82	0.03	56.64	1.53	-1.14	FALSE	0.3	-1.06	-0.05	-0.09	-0.03
